# Supplementary material for: Dissolved Fe across the Weddell Sea and Drake Passage: impact of DFe on nutrient uptake
Source: Copernicus journal article supplement (doi:10.5194/bg-11-651-2014), 2014-02-06
Supplement: Supplementary file 1 [file Dataset S4 Precipitation Data 6-7 April_2008_ANTXXIV_3.xlsx]

## Sheet: Sheet1
Date/time		Date	Time	Weatherstation
				precipitation
				mm/hr
2008-04-06 02:00:00	2008-04-06	02:00:00	60	0
2008-04-06 03:00:00	2008-04-06	03:00:00	60	0
2008-04-06 04:00:00	2008-04-06	04:00:00	60	0
2008-04-06 05:00:00	2008-04-06	05:00:00	60	0
2008-04-06 06:00:00	2008-04-06	06:00:00	60	0
2008-04-06 07:00:00	2008-04-06	07:00:00	60	0.14
2008-04-06 08:00:00	2008-04-06	08:00:00	60	0.61
2008-04-06 09:00:00	2008-04-06	09:00:00	60	0.61
2008-04-06 10:00:00	2008-04-06	10:00:00	60	0.61
2008-04-06 11:00:00	2008-04-06	11:00:00	60	0.38
2008-04-06 12:00:00	2008-04-06	12:00:00	60	0.07
2008-04-06 13:00:00	2008-04-06	13:00:00	60	0.22
2008-04-06 14:00:00	2008-04-06	14:00:00	60	0.12
2008-04-06 15:00:00	2008-04-06	15:00:00	60	0.09
2008-04-06 16:00:00	2008-04-06	16:00:00	60	0.01
2008-04-06 17:00:00	2008-04-06	17:00:00	60	0.21
2008-04-06 18:00:00	2008-04-06	18:00:00	60	0.06
2008-04-06 19:00:00	2008-04-06	19:00:00	60	0.12
2008-04-06 20:00:00	2008-04-06	20:00:00	60	0.79
2008-04-06 21:00:00	2008-04-06	21:00:00	60	0.77	Start of Station 238
2008-04-06 22:00:00	2008-04-06	22:00:00	60	0.2
2008-04-06 23:00:00	2008-04-06	23:00:00	60	0.01
2008-04-07	2008-04-07	00:00:00	60	0
2008-04-07 01:00:00	2008-04-07	01:00:00	60	0
2008-04-07 02:00:00	2008-04-07	02:00:00	60	0
2008-04-07 03:00:00	2008-04-07	03:00:00	60	0.17
2008-04-07 04:00:00	2008-04-07	04:00:00	60	0.63
2008-04-07 05:00:00	2008-04-07	05:00:00	60	0.2
2008-04-07 06:00:00	2008-04-07	06:00:00	60	0
2008-04-07 07:00:00	2008-04-07	07:00:00	60	0
2008-04-07 08:00:00	2008-04-07	08:00:00	60	0
2008-04-07 09:00:00	2008-04-07	09:00:00	60	0
2008-04-07 10:00:00	2008-04-07	10:00:00	60	0
2008-04-07 11:00:00	2008-04-07	11:00:00	60	0
2008-04-07 12:00:00	2008-04-07	12:00:00	60	0
2008-04-07 13:00:00	2008-04-07	13:00:00	60	0
2008-04-07 14:00:00	2008-04-07	14:00:00	60	0
2008-04-07 15:00:00	2008-04-07	15:00:00	60	0
2008-04-07 16:00:00	2008-04-07	16:00:00	60	0
2008-04-07 17:00:00	2008-04-07	17:00:00	60	0
2008-04-07 18:00:00	2008-04-07	18:00:00	60	0	Start of Station 241
2008-04-07 19:00:00	2008-04-07	19:00:00	60	0.07
2008-04-07 20:00:00	2008-04-07	20:00:00	60	0
2008-04-07 21:00:00	2008-04-07	21:00:00	60	0.23
2008-04-07 22:00:00	2008-04-07	22:00:00	60	0.14
2008-04-07 23:00:00	2008-04-07	23:00:00	60	0.13
