# Supplementary material for: Dissolved Fe across the Weddell Sea and Drake Passage: impact of DFe on nutrient uptake
Source: Copernicus journal article supplement (doi:10.5194/bg-11-651-2014), 2014-02-06
Supplement: Supplementary file 2 [file Dataset_S3_DFe.xlsx]

## Sheet: Database_DFe_ANTXXIV_3_BGS
Cruise	Station	Latitude [oN]	Longitude [oE]	Year	Month	Day	Bot. Depth [m]	Depth [m]	stn	Temperature [oC ITS90]	Pot.Temp [oC]	Salinity [PSS78]	Sigma-0	PO4 [umol/kg]	Si [umol/kg]	NOx [umol/kg]	NO2 [umol/kg]	dFe[nmol/l]	QF	dFe STD [nmol/l]
ANT24-3	18701	-68.7969	-17.9469	2008	3	15	4792	4699.7	187	-0.424	-0.771	34.647	27.8581	2.304	131.48	33.1	0.02	0.266	0	0.012
ANT24-3	18701	-68.7969	-17.9469	2008	3	15	4792	4348.8	187	-0.314	-0.625	34.653	27.8563	2.294	127.77	32.94	0.02	0.376	0	0.008
ANT24-3	18701	-68.7969	-17.9469	2008	3	15	4792	3999.3	187	-0.3	-0.575	34.654	27.8554	2.294	124.84	32.86	0.016	0.45	0	0.001
ANT24-3	18701	-68.7969	-17.9469	2008	3	15	4792	2998.6	187	-0.228	-0.41	34.659	27.8515	2.294	123.18	33.04	0.017	0.31	0	0.004
ANT24-3	18701	-68.7969	-17.9469	2008	3	15	4792	2497.9	187	-0.163	-0.305	34.662	27.8488	2.304	124.16	33.2	0.015	0.378	0	0.007
ANT24-3	18701	-68.7969	-17.9469	2008	3	15	4792	1994.3	187	-0.046	-0.153	34.667	27.8451	2.313	123.57	33.3	0.017	0.395	0	0.003
ANT24-3	18701	-68.7969	-17.9469	2008	3	15	4792	1750.8	187	0.028	-0.063	34.67	27.8429	2.323	124.74	33.45	0.017	2.1694	4	0.032
ANT24-3	18701	-68.7969	-17.9469	2008	3	15	4792	1498.9	187	0.114	0.039	34.673	27.8405	2.333	124.35	33.48	0.017	0.277	0	0.004
ANT24-3	18701	-68.7969	-17.9469	2008	3	15	4792	1250	187	0.212	0.151	34.678	27.8379	2.352	123.38	33.67	0.018	0.28	0	0
ANT24-3	18701	-68.7969	-17.9469	2008	3	15	4792	1004.7	187	0.319	0.271	34.682	27.8348	2.362	122.3	33.77	0.016	0.337	0	0.016
ANT24-3	18701	-68.7969	-17.9469	2008	3	15	4792	751.5	187	0.448	0.413	34.687	27.8306	2.352	119.28	33.82	0.018	0.253	0	0.002
ANT24-3	18701	-68.7969	-17.9469	2008	3	15	4792	502	187	0.594	0.571	34.69	27.8236	2.333	112.83	33.65	0.011	0.202	0	0.014
ANT24-3	18701	-68.7969	-17.9469	2008	3	15	4792	401.9	187	0.67	0.652	34.691	27.8197	2.323	110.49	33.63	0.018	0.161	0	0.004
ANT24-3	18701	-68.7969	-17.9469	2008	3	15	4792	301.9	187	0.764	0.751	34.69	27.8122	2.323	106.29	33.59	0.02	0.144	0	0.001
ANT24-3	18701	-68.7969	-17.9469	2008	3	15	4792	250.1	187	0.661	0.65	34.677	27.8082	2.313	102.49	33.55	0.024	0.133	0	0.009
ANT24-3	18701	-68.7969	-17.9469	2008	3	15	4792	199.7	187	0.323	0.314	34.642	27.8004	2.294	97.9	33.39	0.028	0.133	0	0.007
ANT24-3	18701	-68.7969	-17.9469	2008	3	15	4792	149.4	187	-0.682	-0.686	34.543	27.77	2.206	85.32	32.3	0.035	0.242811	0	0.014
ANT24-3	18701	-68.7969	-17.9469	2008	3	15	4792	99.9	187	-1.679	-1.682	34.45	27.7303	2.109	73.02	30.91	0.122	0.095	0	0.004
ANT24-3	18701	-68.7969	-17.9469	2008	3	15	4792	73.4	187	-1.763	-1.765	34.427	27.7145	2.099	71.46	30.44	0.228	0.0832859	0	0.039
ANT24-3	18701	-68.7969	-17.9469	2008	3	15	4792	50.2	187	-1.732	-1.734	34.411	27.7002	2.079	70.39	30.04	0.23	0.102865	0	0.001
ANT24-3	18701	-68.7969	-17.9469	2008	3	15	4792	24.8	187	-1.843	-1.843	33.812	27.2163	1.914	63.49	26.7	0.224	0.0616624	0	0.006
ANT24-3	18701	-68.7969	-17.9469	2008	3	15	4792	24.8	187	-1.844	-1.844	33.812	27.2164	1.905	63.58	26.71	0.213	0.12948	0	0
ANT24-3	18701	-68.7969	-17.9469	2008	3	15	4792	9.5	187	-1.841	-1.841	33.812	27.2165	1.895	63.29	26.55	0.216	0.0552771	0	0.017
ANT24-3	19103	-67.3394	-23.6206	2008	3	17	4873	4799.2	191	-0.466	-0.822	34.645	27.8584	2.255	124.16	32.85	0.029	0.448	0	0.009
ANT24-3	19103	-67.3394	-23.6206	2008	3	17	4873	4503.4	191	-0.443	-0.767	34.648	27.8587	-9999	-9999	-9999	-9999	0.361	0	0.03
ANT24-3	19103	-67.3394	-23.6206	2008	3	17	4873	3998.3	191	-0.355	-0.628	34.653	27.8568	2.255	125.72	32.88	0.028	0.559	0	0.013
ANT24-3	19103	-67.3394	-23.6206	2008	3	17	4873	3000	191	-0.282	-0.463	34.658	27.8533	2.265	122.79	32.96	0.026	0.352	0	0.012
ANT24-3	19103	-67.3394	-23.6206	2008	3	17	4873	2501.1	191	-0.221	-0.362	34.661	27.8507	2.274	123.67	33.15	0.022	0.308	0	0.005
ANT24-3	19103	-67.3394	-23.6206	2008	3	17	4873	2001.4	191	-0.126	-0.231	34.664	27.8473	2.294	124.74	33.32	0.024	0.279195	0	0.003
ANT24-3	19103	-67.3394	-23.6206	2008	3	17	4873	1749.1	191	-0.06	-0.15	34.667	27.8451	2.304	124.84	33.5	0.023	0.15055	0	0.017
ANT24-3	19103	-67.3394	-23.6206	2008	3	17	4873	1500.5	191	0.027	-0.048	34.67	27.8425	2.313	124.74	33.74	0.021	0.243986	0	0.006
ANT24-3	19103	-67.3394	-23.6206	2008	3	17	4873	1250.8	191	0.112	0.052	34.674	27.8403	2.323	125.23	33.82	0.024	0.212	0	0.019
ANT24-3	19103	-67.3394	-23.6206	2008	3	17	4873	1000.1	191	0.217	0.17	34.678	27.8373	2.333	124.25	34.07	0.023	0.208	0	0.007
ANT24-3	19103	-67.3394	-23.6206	2008	3	17	4873	750	191	0.332	0.298	34.683	27.8337	2.343	122.69	34.26	0.021	0.304	0	0.003
ANT24-3	19103	-67.3394	-23.6206	2008	3	17	4873	499.9	191	0.467	0.445	34.687	27.8287	2.362	119.86	34.5	0.022	0.24	0	0.001
ANT24-3	19103	-67.3394	-23.6206	2008	3	17	4873	400.1	191	0.525	0.507	34.688	27.8256	2.352	117.23	34.46	0.022	0.137	0	0.003
ANT24-3	19103	-67.3394	-23.6206	2008	3	17	4873	300.3	191	0.513	0.501	34.681	27.8206	2.313	109.42	33.84	0.034	0.23092	0	0.001
ANT24-3	19103	-67.3394	-23.6206	2008	3	17	4873	249.6	191	0.491	0.48	34.677	27.8182	2.313	110.39	34.06	0.024	0.153	0	0.006
ANT24-3	19103	-67.3394	-23.6206	2008	3	17	4873	199.5	191	0.166	0.158	34.645	27.8114	2.284	104.83	33.58	0.025	0.15	0	0.001
ANT24-3	19103	-67.3394	-23.6206	2008	3	17	4873	149	191	-0.833	-0.838	34.554	27.7854	2.167	90.2	31.83	0.02	0.05	0	0.002
ANT24-3	19103	-67.3394	-23.6206	2008	3	17	4873	99.8	191	-1.688	-1.69	34.477	27.7527	2.05	78.88	30.02	0.318	0.067	0	0.004
ANT24-3	19103	-67.3394	-23.6206	2008	3	17	4873	74	191	-1.718	-1.719	34.463	27.7422	2.011	76.44	29.23	0.315	0.032	0	0.001
ANT24-3	19103	-67.3394	-23.6206	2008	3	17	4873	49.6	191	-1.746	-1.747	34.279	27.5933	1.933	73.42	28.26	0.238	0.103	0	0.001
ANT24-3	19103	-67.3394	-23.6206	2008	3	17	4873	9.3	191	-1.849	-1.849	34.135	27.4791	1.855	71.09	27.32	0.24	0.045	0	0.002
ANT24-3	19306	-66.6059	-27.1845	2008	3	18	4864	4800.4	193	-0.47	-0.826	34.644	27.8582	2.274	123.96	33.28	0.024	0.554	0	0.004
ANT24-3	19306	-66.6059	-27.1845	2008	3	18	4864	4798.7	193	-0.47	-0.826	34.644	27.8581	2.274	123.67	33.2	0.021	0.435	0	0.001
ANT24-3	19306	-66.6059	-27.1845	2008	3	18	4864	3998.9	193	-0.359	-0.632	34.653	27.857	2.274	125.62	33.25	0.02	0.373	0	0.006
ANT24-3	19306	-66.6059	-27.1845	2008	3	18	4864	2997.3	193	-0.283	-0.464	34.658	27.8531	2.284	123.67	33.43	0.022	0.38	0	0.003
ANT24-3	19306	-66.6059	-27.1845	2008	3	18	4864	2997.5	193	-0.283	-0.464	34.658	27.8532	2.284	123.28	33.38	0.02	NULL	NULL	NULL
ANT24-3	19306	-66.6059	-27.1845	2008	3	18	4864	2500	193	-0.223	-0.364	34.661	27.8507	2.294	124.06	33.48	0.019	0.349	0	0.004
ANT24-3	19306	-66.6059	-27.1845	2008	3	18	4864	2000.6	193	-0.13	-0.236	34.664	27.8473	2.313	125.62	33.75	0.019	0.351945	0	0.022
ANT24-3	19306	-66.6059	-27.1845	2008	3	18	4864	1750.2	193	-0.069	-0.159	34.667	27.8454	2.313	125.43	33.76	0.02	0.236	0	0.002
ANT24-3	19306	-66.6059	-27.1845	2008	3	18	4864	1498.1	193	0.012	-0.062	34.67	27.843	2.323	125.62	34.07	0.018	0.25	0	0.002
ANT24-3	19306	-66.6059	-27.1845	2008	3	18	4864	1251.2	193	0.098	0.038	34.673	27.8404	2.343	126.01	34.35	0.016	0.266	0	0.006
ANT24-3	19306	-66.6059	-27.1845	2008	3	18	4864	1000.2	193	0.208	0.162	34.678	27.8374	2.362	125.23	34.35	0.016	0.261	0	0.008
ANT24-3	19306	-66.6059	-27.1845	2008	3	18	4864	752.5	193	0.326	0.292	34.682	27.8338	2.382	123.37	34.73	0.016	0.24	0	0.004
ANT24-3	19306	-66.6059	-27.1845	2008	3	18	4864	501.4	193	0.472	0.45	34.687	27.8281	2.382	120.54	34.91	0.019	0.376	0	0.008
ANT24-3	19306	-66.6059	-27.1845	2008	3	18	4864	400.3	193	0.492	0.474	34.685	27.8252	2.391	117.03	34.88	0.017	0.358	0	0.019
ANT24-3	19306	-66.6059	-27.1845	2008	3	18	4864	300.9	193	0.409	0.397	34.676	27.8223	2.372	113.03	34.7	0.017	0.253	0	0.004
ANT24-3	19306	-66.6059	-27.1845	2008	3	18	4864	200.7	193	-0.27	-0.277	34.611	27.8061	2.265	99.66	33.31	0.019	0.186	0	0.001
ANT24-3	19306	-66.6059	-27.1845	2008	3	18	4864	150.6	193	-1.516	-1.519	34.507	27.7722	2.128	84.54	31.28	0.02	0.236	0	0.004
ANT24-3	19306	-66.6059	-27.1845	2008	3	18	4864	101.8	193	-1.748	-1.75	34.477	27.7547	2.06	80.15	30.09	0.399	0.078	0	0.002
ANT24-3	19306	-66.6059	-27.1845	2008	3	18	4864	50.5	193	-1.633	-1.634	34.134	27.4726	1.875	72.65	27.9	0.257	NULL	NULL	NULL
ANT24-3	19306	-66.6059	-27.1845	2008	3	18	4864	50.3	193	-1.646	-1.647	34.133	27.4715	1.875	72.75	27.84	0.259	0.057	0	0.001
ANT24-3	19306	-66.6059	-27.1845	2008	3	18	4864	24.3	193	-1.672	-1.673	34.129	27.4692	1.865	72.36	27.71	0.26	0.095	0	0.012
ANT24-3	19306	-66.6059	-27.1845	2008	3	18	4864	9.2	193	-1.681	-1.682	34.129	27.4693	1.855	71.97	27.79	0.261	0.173	0	0.005
ANT24-3	19802	-65.6141	-36.3982	2008	3	21	4772	4702.3	198	-0.514	-0.857	34.642	27.8572	2.265	115.96	32.54	0.02	0.304	0	0.007
ANT24-3	19802	-65.6141	-36.3982	2008	3	21	4772	4499.5	198	-0.47	-0.792	34.647	27.8592	2.284	124.84	32.68	0.02	0.266	0	0.011
ANT24-3	19802	-65.6141	-36.3982	2008	3	21	4772	3999.6	198	-0.381	-0.653	34.652	27.8572	2.284	124.94	32.69	0.018	0.283	0	0.005
ANT24-3	19802	-65.6141	-36.3982	2008	3	21	4772	3498.6	198	-0.343	-0.567	34.655	27.8555	2.274	124.55	32.74	0.018	0.293	0	0.044
ANT24-3	19802	-65.6141	-36.3982	2008	3	21	4772	2997.5	198	-0.299	-0.48	34.657	27.8534	2.284	124.55	32.7	0.015	0.321	0	0.006
ANT24-3	19802	-65.6141	-36.3982	2008	3	21	4772	2499.6	198	-0.244	-0.385	34.66	27.8514	2.294	124.84	32.93	0.015	0.307	0	0.019
ANT24-3	19802	-65.6141	-36.3982	2008	3	21	4772	1999.8	198	-0.15	-0.255	34.664	27.8479	2.313	125.91	33.2	0.015	0.162	0	0.004
ANT24-3	19802	-65.6141	-36.3982	2008	3	21	4772	1748.9	198	-0.087	-0.176	34.666	27.8459	2.323	125.43	33.3	0.016	0.178	0	0.002
ANT24-3	19802	-65.6141	-36.3982	2008	3	21	4772	1499.8	198	-0.01	-0.084	34.669	27.8435	2.333	126.6	33.59	0.018	0.145	0	0.007
ANT24-3	19802	-65.6141	-36.3982	2008	3	21	4772	1249.3	198	0.078	0.018	34.672	27.8409	2.343	124.94	33.62	0.02	0.151	0	0.005
ANT24-3	19802	-65.6141	-36.3982	2008	3	21	4772	1000.2	198	0.183	0.137	34.677	27.8381	2.362	126.11	33.96	0.016	0.162	0	0.01
ANT24-3	19802	-65.6141	-36.3982	2008	3	21	4772	749.4	198	0.3	0.266	34.682	27.8347	2.382	125.03	34.36	0.017	0.252	0	0.01
ANT24-3	19802	-65.6141	-36.3982	2008	3	21	4772	499.8	198	0.425	0.403	34.685	27.8298	2.391	121.52	34.4	0.015	0.111	0	0.013
ANT24-3	19802	-65.6141	-36.3982	2008	3	21	4772	401.4	198	0.392	0.375	34.68	27.8273	2.391	118.49	34.43	0.016	0.064	0	0.007
ANT24-3	19802	-65.6141	-36.3982	2008	3	21	4772	300.3	198	0.244	0.232	34.666	27.8243	2.382	120.64	34.45	0.018	0.044	0	0.002
ANT24-3	19802	-65.6141	-36.3982	2008	3	21	4772	200.1	198	0.248	0.24	34.667	27.8241	2.362	112.35	34.19	0.018	0.104	0	0.003
ANT24-3	19802	-65.6141	-36.3982	2008	3	21	4772	148.6	198	-0.749	-0.754	34.577	27.8009	2.226	96.54	32.14	0.024	0.143	0	0.013
ANT24-3	19802	-65.6141	-36.3982	2008	3	21	4772	99.3	198	-1.73	-1.732	34.505	27.7768	2.109	83.56	30.68	0.089	0.0403937	0	0.004
ANT24-3	19802	-65.6141	-36.3982	2008	3	21	4772	73.7	198	-1.628	-1.629	34.451	27.7298	2.05	80.83	29.52	0.175	0.043	0	0.004
ANT24-3	19802	-65.6141	-36.3982	2008	3	21	4772	49.3	198	-1.419	-1.42	34.167	27.4928	1.885	73.92	28.17	0.257	0.041	0	0.002
ANT24-3	19802	-65.6141	-36.3982	2008	3	21	4772	25.3	198	-1.451	-1.451	34.161	27.4887	1.875	73.33	27.85	0.263	0.061	0	0.007
ANT24-3	20402	-64.7899	-42.8577	2008	3	23	4680	4601	204	-0.519	-0.851	34.641	27.8568	2.265	118.11	32.31	0.024	NULL	NULL	NULL
ANT24-3	20402	-64.7899	-42.8577	2008	3	23	4680	3996.1	204	-0.389	-0.661	34.652	27.8575	2.274	124.45	32.52	0.024	0.61	0	0.011
ANT24-3	20402	-64.7899	-42.8577	2008	3	23	4680	3494.9	204	-0.35	-0.575	34.654	27.8555	2.274	123.38	32.41	0.016	0.273	0	0.008
ANT24-3	20402	-64.7899	-42.8577	2008	3	23	4680	2995.2	204	-0.305	-0.486	34.657	27.8536	2.284	122.5	32.56	0.017	0.376	0	0.008
ANT24-3	20402	-64.7899	-42.8577	2008	3	23	4680	2500.8	204	-0.244	-0.385	34.66	27.8512	2.294	123.77	32.66	0.02	0.29	0	0.004
ANT24-3	20402	-64.7899	-42.8577	2008	3	23	4680	2001.1	204	-0.16	-0.266	34.663	27.848	2.313	123.96	32.77	0.013	0.202	0	0.004
ANT24-3	20402	-64.7899	-42.8577	2008	3	23	4680	1750.5	204	-0.098	-0.187	34.665	27.8456	2.313	124.35	33.15	0.016	0.199	0	0.009
ANT24-3	20402	-64.7899	-42.8577	2008	3	23	4680	1501	204	-0.026	-0.099	34.668	27.8435	2.333	125.33	33.17	0.018	0.133	0	0.006
ANT24-3	20402	-64.7899	-42.8577	2008	3	23	4680	1252.5	204	0.065	0.005	34.672	27.8408	2.343	125.23	33.28	0.01	0.148	0	0.001
ANT24-3	20402	-64.7899	-42.8577	2008	3	23	4680	1003.6	204	0.17	0.124	34.676	27.838	2.352	124.64	33.74	0.016	0.117	0	0.001
ANT24-3	20402	-64.7899	-42.8577	2008	3	23	4680	756.4	204	0.288	0.254	34.68	27.8344	2.372	124.25	33.96	0.012	0.156	0	0.002
ANT24-3	20402	-64.7899	-42.8577	2008	3	23	4680	501.7	204	0.386	0.364	34.682	27.8294	2.382	119.28	34.06	0.009	0.202	0	0.006
ANT24-3	20402	-64.7899	-42.8577	2008	3	23	4680	400.8	204	0.281	0.264	34.672	27.8269	2.372	114.79	34.09	0.015	0.12	0	0.003
ANT24-3	20402	-64.7899	-42.8577	2008	3	23	4680	300.6	204	0.178	0.166	34.663	27.8249	2.352	111.66	33.74	0.024	0.143	0	0.005
ANT24-3	20402	-64.7899	-42.8577	2008	3	23	4680	250.2	204	0.186	0.176	34.663	27.8247	2.362	111.47	33.73	0.033	0.114	0	0.001
ANT24-3	20402	-64.7899	-42.8577	2008	3	23	4680	199.3	204	0.011	0.003	34.647	27.8207	2.343	109.52	33.56	0.041	0.137	0	0.006
ANT24-3	20402	-64.7899	-42.8577	2008	3	23	4680	150.8	204	-1.354	-1.358	34.537	27.791	2.157	87.17	31.05	0.042	1.298	4	0.011
ANT24-3	20402	-64.7899	-42.8577	2008	3	23	4680	100.1	204	-1.787	-1.789	34.504	27.7772	2.109	82.1	30.22	0.096	0.06	0	0.002
ANT24-3	20402	-64.7899	-42.8577	2008	3	23	4680	74.7	204	-1.786	-1.788	34.494	27.7693	2.109	81.9	29.93	0.144	0.036	0	0.003
ANT24-3	20402	-64.7899	-42.8577	2008	3	23	4680	50.1	204	-1.717	-1.718	34.469	27.7474	2.089	79.85	29.26	0.163	0.099	0	0.008
ANT24-3	20402	-64.7899	-42.8577	2008	3	23	4680	30.4	204	-1.778	-1.779	33.916	27.2993	1.67	65.24	25.29	0.211	0.0226125	0	0.006
ANT24-3	20402	-64.7899	-42.8577	2008	3	23	4680	24.6	204	-1.778	-1.778	33.916	27.2987	1.65	64.85	25.12	0.206	0.0306152	0	0.008
ANT24-3	21003	-64.0374	-48.2775	2008	3	25	4040	3945.7	210	-0.558	-0.82	34.633	27.8487	2.235	107.37	31.9	0.019	0.69	0	0.016
ANT24-3	21003	-64.0374	-48.2775	2008	3	25	4040	3499.8	210	-0.27	-0.496	34.656	27.8533	2.265	123.38	32.34	0.021	0.453	0	0.011
ANT24-3	21003	-64.0374	-48.2775	2008	3	25	4040	2999.1	210	-0.226	-0.409	34.659	27.8512	2.274	121.91	32.41	0.022	0.441	0	0.01
ANT24-3	21003	-64.0374	-48.2775	2008	3	25	4040	2499.6	210	-0.173	-0.315	34.661	27.8489	2.284	122.01	32.63	0.027	0.329	0	0.008
ANT24-3	21003	-64.0374	-48.2775	2008	3	25	4040	2000.1	210	-0.059	-0.166	34.666	27.8452	2.304	124.35	33.13	0.031	0.268	0	0.006
ANT24-3	21003	-64.0374	-48.2775	2008	3	25	4040	1749.1	210	0.014	-0.077	34.669	27.8429	2.304	124.06	33.15	0.03	0.33	0	0.004
ANT24-3	21003	-64.0374	-48.2775	2008	3	25	4040	1500.6	210	0.097	0.021	34.672	27.8405	2.323	124.35	33.56	0.023	0.315	0	0.007
ANT24-3	21003	-64.0374	-48.2775	2008	3	25	4040	999.9	210	0.31	0.263	34.681	27.8342	2.333	121.62	33.88	0.025	0.330394	0	0.008
ANT24-3	21003	-64.0374	-48.2775	2008	3	25	4040	750	210	0.436	0.402	34.686	27.8301	2.323	118.59	33.87	0.025	0.25	0	0.002
ANT24-3	21003	-64.0374	-48.2775	2008	3	25	4040	499.9	210	0.401	0.379	34.674	27.8223	2.313	110.1	33.67	0.028	0.23	0	0.003
ANT24-3	21003	-64.0374	-48.2775	2008	3	25	4040	349.7	210	0.409	0.394	34.671	27.8187	2.284	106.59	33.41	0.026	0.193	0	0.007
ANT24-3	21003	-64.0374	-48.2775	2008	3	25	4040	249.4	210	0.479	0.469	34.674	27.8165	2.284	105.81	33.27	0.031	0.349109	0	0.005
ANT24-3	21003	-64.0374	-48.2775	2008	3	25	4040	199.5	210	0.198	0.191	34.649	27.8129	2.265	101.61	33.07	0.032	0.18	0	0.008
ANT24-3	21003	-64.0374	-48.2775	2008	3	25	4040	149.6	210	-0.149	-0.154	34.618	27.8057	2.245	98.69	32.91	0.028	0.189	0	0.019
ANT24-3	21003	-64.0374	-48.2775	2008	3	25	4040	99.2	210	-1.138	-1.141	34.533	27.7802	2.187	90.88	31.92	0.061	0.0780015	0	NULL
ANT24-3	21003	-64.0374	-48.2775	2008	3	25	4040	49.3	210	-1.591	-1.592	34.372	27.6647	2.109	85.91	30.73	0.097	0.067	0	0.003
ANT24-3	21003	-64.0374	-48.2775	2008	3	25	4040	29.5	210	-1.71	-1.71	34.022	27.3831	2.061	84.28	29.81	0.112	0.119	0	0.004
ANT24-3	21003	-64.0374	-48.2775	2008	3	25	4040	24.6	210	-1.829	-1.829	33.739	27.1565	1.993	81.56	29.09	0.147	0.125364	0	0.016
ANT24-3	21003	-64.0374	-48.2775	2008	3	25	4040	8	210	-1.811	-1.811	33.738	27.1554	1.963	81.07	28.76	0.157	0.157	0	0.004
ANT24-3	21203	-63.8939	-49.0787	2008	3	26	3505	399.6	212	0.492	0.475	34.671	27.8138	2.264	101.8	32.54	0.018	0.339	0	0.339
ANT24-3	21203	-63.8939	-49.0787	2008	3	26	3505	201	212	-0.593	-0.599	34.548	27.7707	2.206	87.46	31.72	0.019	0.388	0	0.388
ANT24-3	21203	-63.8939	-49.0787	2008	3	26	3505	100.6	212	-1.821	-1.823	34.434	27.7219	2.138	76.83	30.77	0.026	0.26	0	0.26
ANT24-3	21203	-63.8939	-49.0787	2008	3	26	3505	50.1	212	-1.767	-1.768	34.275	27.5904	2.089	78.3	29.84	0.105	0.27	0	0.27
ANT24-3	21203	-63.8939	-49.0787	2008	3	26	3505	20.3	212	-1.77	-1.771	34.173	27.5077	2.06	78.12	29.49	0.104	0.334	0	0.334
ANT24-3	21604	-63.6991	-50.8446	2008	3	27	2536	2450.5	216	-1.144	-1.263	34.607	27.8449	2.177	84.43	31.32	0.012	0.30454	0	0.01
ANT24-3	21604	-63.6991	-50.8446	2008	3	27	2536	2396.9	216	-1.061	-1.178	34.61	27.8441	2.177	83.36	31.24	0.025	0.285169	0	0
ANT24-3	21604	-63.6991	-50.8446	2008	3	27	2536	2396.9	216	-1.061	-1.178	34.61	27.8441	2.177	83.36	31.24	0.025	0.321851	0	0
ANT24-3	21604	-63.6991	-50.8446	2008	3	27	2536	1999.1	216	-0.19	-0.294	34.657	27.8448	2.274	118.89	32.56	0.027	0.265688	0	0.004
ANT24-3	21604	-63.6991	-50.8446	2008	3	27	2536	1749.7	216	-0.028	-0.118	34.664	27.8412	2.284	119.57	32.82	0.021	0.349475	0	0.017
ANT24-3	21604	-63.6991	-50.8446	2008	3	27	2536	1499.5	216	0.104	0.028	34.669	27.8379	2.304	121.81	33.04	0.024	0.227053	0	0.007
ANT24-3	21604	-63.6991	-50.8446	2008	3	27	2536	1250.4	216	0.229	0.168	34.674	27.8342	2.304	119.96	32.93	0.024	0.314056	0	0.004
ANT24-3	21604	-63.6991	-50.8446	2008	3	27	2536	999.5	216	0.375	0.327	34.679	27.8289	2.294	115.96	32.89	0.019	0.855151	0	0.008
ANT24-3	21604	-63.6991	-50.8446	2008	3	27	2536	749.4	216	0.512	0.477	34.682	27.8224	2.284	111.47	32.81	0.025	0.214603	0	0
ANT24-3	21604	-63.6991	-50.8446	2008	3	27	2536	500.3	216	0.494	0.471	34.669	27.8123	2.264	104.25	32.4	0.026	0.153343	0	0.011
ANT24-3	21604	-63.6991	-50.8446	2008	3	27	2536	399.3	216	0.434	0.417	34.653	27.8032	2.255	99.37	32.38	0.02	0.138497	0	0.01
ANT24-3	21604	-63.6991	-50.8446	2008	3	27	2536	299.6	216	-0.001	-0.012	34.599	27.7831	2.245	93.12	32.22	0.027	0.212641	0	0.006
ANT24-3	21604	-63.6991	-50.8446	2008	3	27	2536	199.7	216	-1.47	-1.475	34.458	27.7305	2.167	79.17	31.04	0.028	0.0861112	0	0.002
ANT24-3	21604	-63.6991	-50.8446	2008	3	27	2536	149.6	216	-1.803	-1.806	34.436	27.7226	2.138	77.03	30.81	0.034	0.0473641	0	0.003
ANT24-3	21604	-63.6991	-50.8446	2008	3	27	2536	99.5	216	-1.807	-1.809	34.427	27.7153	2.138	76.25	30.8	0.092	0.0638315	0	0.003
ANT24-3	21604	-63.6991	-50.8446	2008	3	27	2536	73.8	216	-1.806	-1.808	34.415	27.7055	2.128	75.37	30.53	0.173	0.0155785	0	0.008
ANT24-3	21604	-63.6991	-50.8446	2008	3	27	2536	49.5	216	-1.81	-1.811	34.27	27.5876	2.089	74.3	29.75	0.142	0.233666	0	0.001
ANT24-3	21604	-63.6991	-50.8446	2008	3	27	2536	39.6	216	-1.829	-1.83	34.2	27.5314	2.05	73.62	29.18	0.13	0.00958551	0	0.002
ANT24-3	21604	-63.6991	-50.8446	2008	3	27	2536	24.5	216	-1.847	-1.847	34.135	27.4792	2.051	73.04	28.92	0.119	0.009	>LLoD	0.001
ANT24-3	21604	-63.6991	-50.8446	2008	3	27	2536	10.1	216	-1.862	-1.862	34.093	27.4454	2.002	72.55	28.43	0.107	0.009	>LLoD	0.001
ANT24-3	22102	-63.4012	-52.5434	2008	3	28	515	491	221	-0.737	-0.754	34.591	27.8123	2.206	89.02	31.14	0.027	0.865	0	0.024
ANT24-3	22102	-63.4012	-52.5434	2008	3	28	515	479.3	221	-0.739	-0.755	34.592	27.8127	2.206	89.41	31.25	0.024	1.13	0	0.022
ANT24-3	22102	-63.4012	-52.5434	2008	3	28	515	479.3	221	-0.74	-0.757	34.592	27.8128	2.206	89.22	31.17	0.021	0.686	0	0.024
ANT24-3	22102	-63.4012	-52.5434	2008	3	28	515	249.4	221	-1.226	-1.233	34.507	27.7624	2.157	76.05	30.72	0.074	0.985	0	0.035
ANT24-3	22102	-63.4012	-52.5434	2008	3	28	515	99.4	221	-1.597	-1.599	34.363	27.6575	2.109	68.05	29.55	0.161	0.613	0	0.013
ANT24-3	22102	-63.4012	-52.5434	2008	3	28	515	19.5	221	-1.832	-1.832	34.138	27.4811	2.051	63.57	27.37	0.14	1.482	0	0.008
ANT24-3	22202	-63.3537	-52.8473	2008	3	29	447	424.8	222	-0.746	-0.76	34.58	27.8031	2.226	89.41	32.08	0.06	0.642553	0	NULL
ANT24-3	22202	-63.3537	-52.8473	2008	3	29	447	414.4	222	-0.747	-0.76	34.58	27.8031	2.235	88.93	31.93	0.058	0.694085	0	NULL
ANT24-3	22202	-63.3537	-52.8473	2008	3	29	447	404	222	-0.748	-0.761	34.58	27.8032	2.235	89.41	32.02	0.064	0.645932	0	NULL
ANT24-3	22202	-63.3537	-52.8473	2008	3	29	447	394.7	222	-0.75	-0.762	34.58	27.803	2.235	89.41	31.97	0.059	0.691726	0	NULL
ANT24-3	22202	-63.3537	-52.8473	2008	3	29	447	384.9	222	-0.753	-0.765	34.579	27.8029	2.235	88.93	31.84	0.054	0.716513	0	NULL
ANT24-3	22202	-63.3537	-52.8473	2008	3	29	447	374.9	222	-0.771	-0.783	34.577	27.8016	2.226	88.63	31.92	0.034	0.769859	0	NULL
ANT24-3	22202	-63.3537	-52.8473	2008	3	29	447	365.1	222	-0.78	-0.792	34.575	27.8007	2.226	88.05	31.8	0.026	0.805291	0	NULL
ANT24-3	22202	-63.3537	-52.8473	2008	3	29	447	354.8	222	-0.791	-0.803	34.573	27.7993	2.216	87.46	31.72	0.029	0.661778	0	NULL
ANT24-3	22202	-63.3537	-52.8473	2008	3	29	447	344.7	222	-0.809	-0.82	34.571	27.7984	2.216	87.46	31.78	0.026	0.590585	0	NULL
ANT24-3	22202	-63.3537	-52.8473	2008	3	29	447	334.7	222	-0.824	-0.835	34.568	27.7967	2.216	86.78	31.64	0.021	0.615532	0	NULL
ANT24-3	22202	-63.3537	-52.8473	2008	3	29	447	299.6	222	-0.858	-0.867	34.559	27.7905	2.196	84.83	31.6	0.028	0.576892	0	NULL
ANT24-3	22202	-63.3537	-52.8473	2008	3	29	447	274.3	222	-0.848	-0.856	34.547	27.7804	2.196	83.36	31.77	0.033	0.59723	0	NULL
ANT24-3	22202	-63.3537	-52.8473	2008	3	29	447	249.9	222	-0.896	-0.903	34.536	27.7738	2.187	81.9	31.47	0.032	0.603132	0	NULL
ANT24-3	22202	-63.3537	-52.8473	2008	3	29	447	221.8	222	-1.001	-1.008	34.522	27.7662	2.177	79.66	31.39	0.05	0.563004	0	NULL
ANT24-3	22202	-63.3537	-52.8473	2008	3	29	447	199.7	222	-1.02	-1.026	34.517	27.7632	2.177	78.97	31.35	0.048	0.346208	0	NULL
ANT24-3	22202	-63.3537	-52.8473	2008	3	29	447	174.9	222	-1.212	-1.217	34.489	27.747	2.021	61.11	27.15	0.136	0.121288	0	NULL
ANT24-3	22202	-63.3537	-52.8473	2008	3	29	447	150.1	222	-1.36	-1.364	34.464	27.7318	2.148	74.1	30.86	0.106	0.573411	0	NULL
ANT24-3	22202	-63.3537	-52.8473	2008	3	29	447	124.8	222	-1.504	-1.506	34.424	27.7041	2.138	71.27	30.4	0.117	0.742033	0	NULL
ANT24-3	22202	-63.3537	-52.8473	2008	3	29	447	100.3	222	-1.58	-1.582	34.371	27.6636	2.119	68.54	29.81	0.149	0.520073	0	NULL
ANT24-3	22202	-63.3537	-52.8473	2008	3	29	447	74.7	222	-1.509	-1.511	34.316	27.6166	2.109	65.8	29.47	0.168	0.236082	0	NULL
ANT24-3	22202	-63.3537	-52.8473	2008	3	29	447	50	222	-1.821	-1.822	34.099	27.4494	2.041	62.3	27.35	0.15	0.105375	0	NULL
ANT24-3	22202	-63.3537	-52.8473	2008	3	29	447	29.9	222	-1.808	-1.808	34.08	27.433	2.021	61.13	26.99	0.15	0.0759846	0	NULL
ANT24-3	22202	-63.3537	-52.8473	2008	3	29	447	19.6	222	-1.809	-1.809	34.079	27.4326	2.021	61.32	26.98	0.144	NULL	NULL	NULL
ANT24-3	22202	-63.3537	-52.8473	2008	3	29	447	9.9	222	-1.812	-1.812	34.079	27.4325	2.021	61.13	26.86	0.14	NULL	NULL	NULL
ANT24-3	22302	-63.2848	-53.2374	2008	3	29	431	416	223	-0.886	-0.899	34.558	27.7915	2.216	84.83	31.73	0.072	1.299	0	0.012
ANT24-3	22302	-63.2848	-53.2374	2008	3	29	431	405.6	223	-0.886	-0.899	34.559	27.7918	2.216	85.12	31.77	0.068	1.35	0	0.026
ANT24-3	22302	-63.2848	-53.2374	2008	3	29	431	394.3	223	-0.885	-0.898	34.559	27.7919	2.216	85.02	31.68	0.072	1.408	0	0.033
ANT24-3	22302	-63.2848	-53.2374	2008	3	29	431	384.3	223	-0.886	-0.898	34.559	27.792	2.04	65.3	28.32	0.137	0.71	0	0.043
ANT24-3	22302	-63.2848	-53.2374	2008	3	29	431	29.5	223	-1.822	-1.823	34.18	27.5152	2.051	65.62	28.32	0.141	0.89	0	0.1
ANT24-3	22602	-60.6268	-53.8302	2008	4	1	2776	898	226	0.847	0.802	34.687	27.8069	2.206	106.45	32.21	0.049	1.042	0	0.014
ANT24-3	22602	-60.6268	-53.8302	2008	4	1	2776	749.6	226	0.818	0.781	34.674	27.7973	2.196	102.48	32.06	0.049	0.869	0	0.021
ANT24-3	22602	-60.6268	-53.8302	2008	4	1	2776	582	226	0.608	0.581	34.626	27.7717	2.196	95.83	32.07	0.049	1.359	0	0.011
ANT24-3	22602	-60.6268	-53.8302	2008	4	1	2776	551.2	226	0.736	0.71	34.631	27.7675	2.196	94.07	31.97	0.059	0.909	0	0.022
ANT24-3	22602	-60.6268	-53.8302	2008	4	1	2776	500.7	226	0.793	0.77	34.621	27.7559	2.196	91.75	32.14	0.059	0.906	0	0.009
ANT24-3	22602	-60.6268	-53.8302	2008	4	1	2776	447.4	226	0.811	0.79	34.612	27.7471	2.216	90.58	32.28	0.049	1.753	0	0.052
ANT24-3	22602	-60.6268	-53.8302	2008	4	1	2776	401.2	226	0.703	0.685	34.57	27.7199	2.216	86.99	32.27	0.088	1.4	0	0.003
ANT24-3	22602	-60.6268	-53.8302	2008	4	1	2776	354	226	0.658	0.643	34.546	27.7028	2.216	85.47	32.29	0.098	1.631	0	0.02
ANT24-3	22602	-60.6268	-53.8302	2008	4	1	2776	300.4	226	0.469	0.456	34.499	27.6769	2.196	84.45	32.08	0.185	1.486	0	0.01
ANT24-3	22602	-60.6268	-53.8302	2008	4	1	2776	274.6	226	0.434	0.423	34.476	27.6596	2.206	82.37	31.99	0.185	1.352	0	0.033
ANT24-3	22602	-60.6268	-53.8302	2008	4	1	2776	250.3	226	0.357	0.347	34.459	27.6505	2.167	82.41	31.68	0.215	1.465	0	0.008
ANT24-3	22602	-60.6268	-53.8302	2008	4	1	2776	223.1	226	0.329	0.32	34.442	27.6382	2.157	82.03	31.28	0.225	1.778	0	0.044
ANT24-3	22602	-60.6268	-53.8302	2008	4	1	2776	200.2	226	0.362	0.354	34.422	27.6199	2.138	81.49	30.93	0.234	1.566	0	0.013
ANT24-3	22602	-60.6268	-53.8302	2008	4	1	2776	175.2	226	0.39	0.383	34.4	27.6005	2.119	80.77	30.61	0.225	1.248	0	0.024
ANT24-3	22602	-60.6268	-53.8302	2008	4	1	2776	148.4	226	0.468	0.462	34.369	27.5715	2.109	79.77	30.3	0.234	0.954	0	0.024
ANT24-3	22602	-60.6268	-53.8302	2008	4	1	2776	126.5	226	0.496	0.491	34.361	27.5631	2.07	77.4	29.49	0.244	1.425	0	0.006
ANT24-3	22602	-60.6268	-53.8302	2008	4	1	2776	99.4	226	0.567	0.562	34.336	27.5389	2.07	77.67	29.85	0.244	1.148	0	0.016
ANT24-3	22602	-60.6268	-53.8302	2008	4	1	2776	80.2	226	0.624	0.621	34.323	27.525	2.06	77.45	29.66	0.234	0.981	0	0.014
ANT24-3	22602	-60.6268	-53.8302	2008	4	1	2776	60.3	226	0.631	0.629	34.322	27.5232	2.05	77.2	29.52	0.244	1.121	0	0.007
ANT24-3	22602	-60.6268	-53.8302	2008	4	1	2776	53.4	226	0.631	0.628	34.321	27.5231	2.05	77.17	29.59	0.234	1.085	0	0.035
ANT24-3	22602	-60.6268	-53.8302	2008	4	1	2776	40	226	0.633	0.631	34.321	27.5227	2.041	76.67	29.67	0.234	1.188	0	0.006
ANT24-3	22602	-60.6268	-53.8302	2008	4	1	2776	28.1	226	0.633	0.632	34.32	27.5221	2.05	76.68	29.55	0.234	1.121	0	0.059
ANT24-3	22602	-60.6268	-53.8302	2008	4	1	2776	19.7	226	0.631	0.63	34.321	27.5226	2.041	76.84	29.57	0.234	1.836	0	0.058
ANT24-3	22602	-60.6268	-53.8302	2008	4	1	2776	8.7	226	0.631	0.631	34.321	27.5227	2.041	76.67	29.5	0.234	1.275	0	0.043
ANT24-3	23006	-60.1012	-55.2747	2008	4	3	3516	3421.7	230	-0.034	-0.259	34.658	27.8434	2.255	116.19	32.59	0.02	0.651	0	0.007
ANT24-3	23006	-60.1012	-55.2747	2008	4	3	3516	3167	230	0.04	-0.164	34.662	27.8417	2.255	116.06	32.58	0.01	0.595	0	0.038
ANT24-3	23006	-60.1012	-55.2747	2008	4	3	3516	2999.2	230	0.08	-0.109	34.664	27.8411	2.255	116.85	32.71	0.01	0.745	0	0.053
ANT24-3	23006	-60.1012	-55.2747	2008	4	3	3516	2499	230	0.44	0.286	34.696	27.8455	NULL	NULL	NULL	NULL	0.41	0	0.028
ANT24-3	23006	-60.1012	-55.2747	2008	4	3	3516	1998.1	230	0.735	0.616	34.708	27.8355	2.235	121.58	32.37	0.02	0.351	0	0.01
ANT24-3	23006	-60.1012	-55.2747	2008	4	3	3516	1747.5	230	0.867	0.765	34.713	27.8302	2.225	116.61	32.27	0.01	0.424	0	0.018
ANT24-3	23006	-60.1012	-55.2747	2008	4	3	3516	1500.5	230	1.037	0.95	34.718	27.822	2.206	112.45	31.99	0.01	0.444	0	0.011
ANT24-3	23006	-60.1012	-55.2747	2008	4	3	3516	1252.3	230	1.215	1.143	34.723	27.8132	2.196	106.61	31.86	0.01	0.419	0	0.013
ANT24-3	23006	-60.1012	-55.2747	2008	4	3	3516	999.7	230	1.412	1.355	34.727	27.8015	2.196	101.15	31.79	0.01	0.569	0	0.031
ANT24-3	23006	-60.1012	-55.2747	2008	4	3	3516	750.2	230	1.587	1.545	34.722	27.784	2.206	95.47	31.82	0.01	0.41	0	0.012
ANT24-3	23006	-60.1012	-55.2747	2008	4	3	3516	599.7	230	1.775	1.742	34.715	27.7634	2.216	89.68	32.02	0.01	0.402822	0	0.022
ANT24-3	23006	-60.1012	-55.2747	2008	4	3	3516	498	230	1.814	1.786	34.692	27.7414	2.235	86.93	32.42	0.01	0.407	0	0.009
ANT24-3	23006	-60.1012	-55.2747	2008	4	3	3516	399.4	230	1.933	1.911	34.674	27.7177	2.274	84.44	32.89	0.01	0.385	0	0.004
ANT24-3	23006	-60.1012	-55.2747	2008	4	3	3516	352.8	230	1.953	1.933	34.654	27.6996	2.304	82.64	33.3	0.01	0.575	0	0.036
ANT24-3	23006	-60.1012	-55.2747	2008	4	3	3516	299.7	230	1.564	1.549	34.592	27.6793	2.294	80.93	33.02	0.02	0.639	0	0.01
ANT24-3	23006	-60.1012	-55.2747	2008	4	3	3516	249.4	230	0.265	0.255	34.44	27.6401	2.138	80.25	30.42	0.088	1.032	0	0
ANT24-3	23006	-60.1012	-55.2747	2008	4	3	3516	199.3	230	0.341	0.333	34.405	27.6078	2.119	79.23	30.08	0.107	1.316	0	0.039
ANT24-3	23006	-60.1012	-55.2747	2008	4	3	3516	148.2	230	0.488	0.482	34.349	27.5539	2.08	77.26	29.48	0.146	1.859	0	0.072
ANT24-3	23006	-60.1012	-55.2747	2008	4	3	3516	95.5	230	0.605	0.601	34.309	27.5145	2.06	75.37	28.99	0.186	2.223	0	0.001
ANT24-3	23006	-60.1012	-55.2747	2008	4	3	3516	74.5	230	0.616	0.613	34.301	27.5076	2.05	75.15	28.9	0.195	1.937	0	0.082
ANT24-3	23006	-60.1012	-55.2747	2008	4	3	3516	47	230	0.819	0.817	34.137	27.3632	1.963	63.01	28	0.215	NULL	NULL	NULL
ANT24-3	23006	-60.1012	-55.2747	2008	4	3	3516	49	230	0.829	0.827	34.133	27.3595	NULL	NULL	NULL	NULL	1.132	0	0.014
ANT24-3	23006	-60.1012	-55.2747	2008	4	3	3516	22.8	230	1.292	1.291	33.923	27.16	1.826	46.14	26.16	0.244	0.211	0	0.007
ANT24-3	23006	-60.1012	-55.2747	2008	4	3	3516	23.7	230	1.323	1.322	33.91	27.148	1.807	45.08	26.09	0.244	0.23	0	0.002
ANT24-3	23603	-58.9697	-58.1395	2008	4	5	3787	3499.8	236	0.023	-0.211	34.66	27.8424	2.274	117.17	32.96	0.01	1.417	0	0.058
ANT24-3	23603	-58.9697	-58.1395	2008	4	5	3787	3197.5	236	0.078	-0.129	34.663	27.8411	2.274	117.11	32.67	0.01	0.692	0	0.017
ANT24-3	23603	-58.9697	-58.1395	2008	4	5	3787	2797.1	236	0.213	0.039	34.672	27.8393	2.264	117.62	32.67	0.01	0.567	0	0.017
ANT24-3	23603	-58.9697	-58.1395	2008	4	5	3787	2498	236	0.371	0.218	34.682	27.8376	2.264	119.79	32.7	0.01	0.604	0	0.027
ANT24-3	23603	-58.9697	-58.1395	2008	4	5	3787	2251.2	236	0.521	0.386	34.691	27.8349	2.255	120.32	32.52	0.01	0.492	0	0.004
ANT24-3	23603	-58.9697	-58.1395	2008	4	5	3787	1999.4	236	0.652	0.534	34.698	27.8319	2.245	119.32	32.36	0.01	0.484	0	0.035
ANT24-3	23603	-58.9697	-58.1395	2008	4	5	3787	1748.2	236	0.778	0.677	34.701	27.8261	2.235	115.97	32.26	0.01	0.456	0	0.036
ANT24-3	23603	-58.9697	-58.1395	2008	4	5	3787	1499.7	236	0.932	0.847	34.706	27.8187	2.235	111.75	32.17	0.01	0.581789	0	0.04
ANT24-3	23603	-58.9697	-58.1395	2008	4	5	3787	1251.1	236	1.143	1.073	34.712	27.8093	2.225	106.55	31.84	0.01	0.43	0	0.033
ANT24-3	23603	-58.9697	-58.1395	2008	4	5	3787	1003.5	236	1.337	1.281	34.71	27.7931	2.216	99.67	31.74	0.01	0.276678	0	0.023
ANT24-3	23603	-58.9697	-58.1395	2008	4	5	3787	750	236	1.523	1.481	34.7	27.7705	2.235	92.7	32	0.02	0.514	0	0.002
ANT24-3	23603	-58.9697	-58.1395	2008	4	5	3787	596.4	236	1.559	1.526	34.667	27.7412	2.265	87.31	32.3	0.01	0.497	0	0.018
ANT24-3	23603	-58.9697	-58.1395	2008	4	5	3787	499.1	236	1.671	1.644	34.657	27.724	2.284	85.17	32.84	0.01	0.775	0	0.01
ANT24-3	23603	-58.9697	-58.1395	2008	4	5	3787	397.4	236	1.712	1.691	34.63	27.6989	2.304	83.32	33.3	0.02	0.403	0	0.012
ANT24-3	23603	-58.9697	-58.1395	2008	4	5	3787	299.8	236	1.643	1.628	34.575	27.6596	2.343	79.35	33.91	0.01	0.574	0	0.032
ANT24-3	23603	-58.9697	-58.1395	2008	4	5	3787	247.4	236	1.179	1.167	34.473	27.6108	2.333	75.95	34.05	0.02	0.677	0	0.047
ANT24-3	23603	-58.9697	-58.1395	2008	4	5	3787	199.6	236	1.111	1.102	34.406	27.5612	2.314	70.86	33.88	0.029	0.453	0	0.023
ANT24-3	23603	-58.9697	-58.1395	2008	4	5	3787	117.9	236	0.655	0.65	34.169	27.399	2.168	55.66	31.59	0.361	0.177	0	0.014
ANT24-3	23603	-58.9697	-58.1395	2008	4	5	3787	98.6	236	1.035	1.031	34.073	27.2979	2.08	50.87	30.1	0.42	0.107	0	0.005
ANT24-3	23603	-58.9697	-58.1395	2008	4	5	3787	73.6	236	2.309	2.306	33.92	27.0824	1.904	43.38	27.46	0.332	NULL	NULL	NULL
ANT24-3	23603	-58.9697	-58.1395	2008	4	5	3787	73.6	236	2.309	2.306	33.92	27.0824	1.904	43.38	27.46	0.332	0.069	0	0.002
ANT24-3	23603	-58.9697	-58.1395	2008	4	5	3787	49.2	236	2.498	2.495	33.889	27.0418	1.836	39.88	26.59	0.283	0.056	0	0.002
ANT24-3	23603	-58.9697	-58.1395	2008	4	5	3787	23.5	236	2.496	2.495	33.886	27.0394	1.807	39.02	26.61	0.264	0.178	0	0.019
ANT24-3	23603	-58.9697	-58.1395	2008	4	5	3787	24.1	236	2.495	2.494	33.886	27.0392	1.797	38.83	26.57	0.264	0.591	0	0.003
ANT24-3	23802	-58.3003	-59.4793	2008	4	6	3076	2952.5	238	0.565	0.369	34.697	27.8411	NULL	NULL	NULL	NULL	NULL	NULL	NULL
ANT24-3	23802	-58.3003	-59.4793	2008	4	6	3076	2900.1	238	0.589	0.397	34.699	27.8411	2.264	124.57	33.12	0.02	0.560288	0	0.02
ANT24-3	23802	-58.3003	-59.4793	2008	4	6	3076	2747.9	238	0.624	0.445	34.7	27.8394	2.264	123.9	33.32	0.02	0.527669	0	0.026
ANT24-3	23802	-58.3003	-59.4793	2008	4	6	3076	2499.7	238	0.682	0.523	34.699	27.8339	2.245	121.31	33	0.02	0.430449	0	0.017
ANT24-3	23802	-58.3003	-59.4793	2008	4	6	3076	2249.3	238	0.777	0.637	34.705	27.8315	2.245	120.29	32.85	0.02	0.531257	0	0.031
ANT24-3	23802	-58.3003	-59.4793	2008	4	6	3076	1998.7	238	0.969	0.846	34.712	27.8238	2.225	112.65	32.53	0.02	0.493135	0	0.038
ANT24-3	23802	-58.3003	-59.4793	2008	4	6	3076	1748.5	238	0.612	0.513	34.65	27.795	2.216	102.09	32.38	0.02	0.758	0	0.025
ANT24-3	23802	-58.3003	-59.4793	2008	4	6	3076	1498.5	238	1.236	1.147	34.711	27.8031	2.216	103.18	32.8	0.02	0.531853	0	0.035
ANT24-3	23802	-58.3003	-59.4793	2008	4	6	3076	1248	238	1.451	1.377	34.723	27.7967	2.216	99.78	32.39	0.02	0.415236	0	0.004
ANT24-3	23802	-58.3003	-59.4793	2008	4	6	3076	1001.6	238	1.626	1.568	34.717	27.778	2.216	93	32.39	0.02	0.389524	0	0.008
ANT24-3	23802	-58.3003	-59.4793	2008	4	6	3076	749.3	238	1.872	1.829	34.708	27.751	2.245	88.25	32.58	0.02	0.267436	0	0.013
ANT24-3	23802	-58.3003	-59.4793	2008	4	6	3076	599.3	238	2.021	1.986	34.683	27.7191	NULL	NULL	NULL	NULL	0.248444	0	NULL
ANT24-3	23802	-58.3003	-59.4793	2008	4	6	3076	500.1	238	2.082	2.053	34.661	27.6956	2.304	80.8	33.71	0.02	0.335	0	0.014
ANT24-3	23802	-58.3003	-59.4793	2008	4	6	3076	401.5	238	2.102	2.08	34.619	27.6604	2.343	77.86	34.66	0.02	0.412016	0	0.043
ANT24-3	23802	-58.3003	-59.4793	2008	4	6	3076	299.9	238	1.856	1.84	34.512	27.5932	2.401	72.2	35.53	0.02	0.231234	0	0.027
ANT24-3	23802	-58.3003	-59.4793	2008	4	6	3076	250.3	238	1.482	1.47	34.426	27.5515	2.392	66.7	35.38	0.029	0.131896	0	0
ANT24-3	23802	-58.3003	-59.4793	2008	4	6	3076	202.2	238	1.022	1.013	34.322	27.499	2.343	58.59	34.52	0.029	0.523	0	0.066
ANT24-3	23802	-58.3003	-59.4793	2008	4	6	3076	151.1	238	-0.118	-0.123	34.163	27.4368	2.226	48.12	32.41	0.107	0.0361057	0	0.006
ANT24-3	23802	-58.3003	-59.4793	2008	4	6	3076	101.9	238	1.365	1.36	33.861	27.1059	1.875	35.05	26.88	0.254	0.0131818	0	0.001
ANT24-3	23802	-58.3003	-59.4793	2008	4	6	3076	76.5	238	2.172	2.168	33.774	26.9762	1.739	22.28	25.71	0.273	0.009	0	0.003
ANT24-3	23802	-58.3003	-59.4793	2008	4	6	3076	49.3	238	2.201	2.198	33.773	26.9729	1.709	20.93	25.58	0.283	0.0223106	0	0
ANT24-3	23802	-58.3003	-59.4793	2008	4	6	3076	40.1	238	2.225	2.223	33.771	26.9698	1.7	20.47	25.39	0.283	0.0210723	0	0.002
ANT24-3	23802	-58.3003	-59.4793	2008	4	6	3076	25.8	238	2.231	2.23	33.769	26.9673	1.69	20.14	25.61	0.283	0.291667	0	0.017
ANT24-3	23802	-58.3003	-59.4793	2008	4	6	3076	9.1	238	2.256	2.255	33.768	26.9643	1.68	19.52	25.42	0.283	1.32051	0	0.038
ANT24-3	24106	-57.6278	-60.8978	2008	4	7	3425	3350.45	241	0.679	0.443	34.698	27.8377	2.274	121.21	33.02	0.02	0.351024	0	0.01
ANT24-3	24106	-57.6278	-60.8978	2008	4	7	3425	3223.78	241	0.73	0.505	34.702	27.8369	2.264	121.2	33.1	0.02	0.286717	0	0.01
ANT24-3	24106	-57.6278	-60.8978	2008	4	7	3425	3002.45	241	0.73	0.505	34.702	27.8369	2.264	121.2	33.1	0.02	0.304213	0	0.01
ANT24-3	24106	-57.6278	-60.8978	2008	4	7	3425	2797.4	241	0.902	0.712	34.711	27.832	2.264	120.47	32.97	0.02	0.514742	0	0
ANT24-3	24106	-57.6278	-60.8978	2008	4	7	3425	2499.6	241	1.062	0.895	34.716	27.824	2.245	114.95	32.78	0.01	0.715634	0	0.03
ANT24-3	24106	-57.6278	-60.8978	2008	4	7	3425	2251.3	241	1.208	1.061	34.72	27.8164	2.245	110.95	32.84	0.02	0.55418	0	0.02
ANT24-3	24106	-57.6278	-60.8978	2008	4	7	3425	1999.3	241	1.392	1.262	34.724	27.8056	2.225	105.68	32.55	0.01	0.517061	0	0.02
ANT24-3	24106	-57.6278	-60.8978	2008	4	7	3425	1749.8	241	1.527	1.416	34.726	27.7966	2.225	100.72	32.92	0.02	0.464495	0	0.02
ANT24-3	24106	-57.6278	-60.8978	2008	4	7	3425	1498.9	241	1.72	1.626	34.725	27.7799	2.225	95.54	32.59	0.02	0.297682	0	0.02
ANT24-3	24106	-57.6278	-60.8978	2008	4	7	3425	1249	241	1.925	1.846	34.712	27.7532	2.245	89.97	32.65	0.02	0.300815	0	0.02
ANT24-3	24106	-57.6278	-60.8978	2008	4	7	3425	999.1	241	2.088	2.026	34.68	27.7131	2.294	83.64	33.48	0.01	0.34898	0	0.01
ANT24-3	24106	-57.6278	-60.8978	2008	4	7	3425	750.5	241	2.177	2.132	34.604	27.6439	2.372	78.31	34.93	0.02	0.237105	0	0
ANT24-3	24106	-57.6278	-60.8978	2008	4	7	3425	480.6	241	2.253	2.225	34.471	27.53	2.421	68.06	35.72	0.02	0.197	0	0.007
ANT24-3	24106	-57.6278	-60.8978	2008	4	7	3425	401.2	241	2.053	2.031	34.392	27.4817	2.411	62.05	35.58	0.02	0.149055	0	0
ANT24-3	24106	-57.6278	-60.8978	2008	4	7	3425	300.92	241	1.833	1.817	34.296	27.4219	2.363	53.82	34.78	0.029	0.0871975	0	0
ANT24-3	24106	-57.6278	-60.8978	2008	4	7	3425	251.16	241	1.357	1.345	34.202	27.3806	2.285	46.34	33.52	0.02	0.242	0	0.002
ANT24-3	24106	-57.6278	-60.8978	2008	4	7	3425	198.67	241	1.357	1.345	34.202	27.3806	2.285	46.34	33.52	0.02	0.104127	0	0.002
ANT24-3	24106	-57.6278	-60.8978	2008	4	7	3425	150.01	241	0.245	0.238	34.034	27.3137	2.129	32.01	31.09	0.059	0.0467752	0	0
ANT24-3	24106	-57.6278	-60.8978	2008	4	7	3425	99.91	241	1.322	1.317	33.865	27.1116	1.924	17.5	26.98	0.244	0.0664201	0	0.01
ANT24-3	24106	-57.6278	-60.8978	2008	4	7	3425	84.5	241	2.255	2.25	33.82	27.0065	1.865	14.92	26.41	0.254	0.137	0	0.006
ANT24-3	24106	-57.6278	-60.8978	2008	4	7	3425	74.6	241	2.429	2.425	33.812	26.9862	1.778	10.44	25.64	0.264	0.0588154	0	0
ANT24-3	24106	-57.6278	-60.8978	2008	4	7	3425	49.8	241	2.703	2.701	33.795	26.9496	1.719	9.06	25.37	0.264	0.192895	0	0
ANT24-3	24106	-57.6278	-60.8978	2008	4	7	3425	24.5	241	2.865	2.864	33.794	26.9343	1.719	8.87	25.27	0.254	0.378502	0	0.02
ANT24-3	24106	-57.6278	-60.8978	2008	4	7	3425	10	241	2.877	2.876	33.794	26.933	1.719	8.91	25.29	0.254	0.145612	0	0
ANT24-3	24403	-56.9192	-62.3921	2008	4	9	4098	4002.3	244	0.784	0.477	34.699	27.8367	2.245	120.1	32.72	0.02	0.327652	0	0.004
ANT24-3	24403	-56.9192	-62.3921	2008	4	9	4098	3748.6	244	0.898	0.615	34.707	27.8342	2.245	120.11	32.46	0.01	0.363418	0	0.004
ANT24-3	24403	-56.9192	-62.3921	2008	4	9	4098	3500.5	244	0.951	0.692	34.71	27.832	2.235	119.44	32.41	0.01	0.388802	0	0.008
ANT24-3	24403	-56.9192	-62.3921	2008	4	9	4098	2998.3	244	1.138	0.925	34.716	27.8222	2.235	114.52	32.39	0.01	0.509301	0	0.016
ANT24-3	24403	-56.9192	-62.3921	2008	4	9	4098	2497.1	244	1.469	1.296	34.725	27.8045	2.216	104.05	31.92	0.02	0.408987	0	0.002
ANT24-3	24403	-56.9192	-62.3921	2008	4	9	4098	1998.4	244	1.886	1.749	34.719	27.7662	2.216	91.29	32.02	0.02	0.387729	0	0.002
ANT24-3	24403	-56.9192	-62.3921	2008	4	9	4098	1748.74	244	1.886	1.749	34.719	27.7662	2.216	91.29	32.02	0.02	0.446188	0	0.028
ANT24-3	24403	-56.9192	-62.3921	2008	4	9	4098	1499.1	244	2.194	2.094	34.666	27.697	2.294	84.53	33.22	0.02	0.41296	0	0.011
ANT24-3	24403	-56.9192	-62.3921	2008	4	9	4098	1250.3	244	2.343	2.261	34.617	27.6437	2.333	78.19	33.97	0.02	0.522	0	0.023
ANT24-3	24403	-56.9192	-62.3921	2008	4	9	4098	1000.4	244	2.534	2.468	34.513	27.5431	2.392	68.37	34.61	0.02	0.335026	0	0.006
ANT24-3	24403	-56.9192	-62.3921	2008	4	9	4098	747.5	244	2.778	2.729	34.398	27.4285	2.343	55.41	34.36	0.02	0.688112	0	0.019
ANT24-3	24403	-56.9192	-62.3921	2008	4	9	4098	501.7	244	3.109	3.076	34.22	27.2555	2.148	33.75	31.71	0.02	0.512279	0	0.013
ANT24-3	24403	-56.9192	-62.3921	2008	4	9	4098	399.2	244	3.171	3.145	34.133	27.1796	2.021	24.39	29.7	0.02	0.237	0	0.001
ANT24-3	24403	-56.9192	-62.3921	2008	4	9	4098	299.4	244	3.3	3.28	34.079	27.1243	1.914	18.62	28.33	0.02	0.15219	0	0.007
ANT24-3	24403	-56.9192	-62.3921	2008	4	9	4098	249.5	244	3.362	3.346	34.05	27.0952	1.855	15.71	27.25	0.02	0.191881	0	0.001
ANT24-3	24403	-56.9192	-62.3921	2008	4	9	4098	200.1	244	3.655	3.642	34.055	27.0706	1.807	13.66	26.35	0.029	0.131674	0	0.009
ANT24-3	24403	-56.9192	-62.3921	2008	4	9	4098	146.8	244	3.829	3.819	34.049	27.0482	1.758	11.83	25.79	0.029	0.129118	0	0.01
ANT24-3	24403	-56.9192	-62.3921	2008	4	9	4098	100.3	244	4.486	4.479	33.989	26.9315	1.68	8.35	24.38	0.283	0.105419	0	0.005
ANT24-3	24403	-56.9192	-62.3921	2008	4	9	4098	73.1	244	5.249	5.244	33.929	26.7984	1.611	4.68	22.72	0.293	0.087146	0	0.001
ANT24-3	24403	-56.9192	-62.3921	2008	4	9	4098	49.8	244	5.376	5.372	33.924	26.7789	1.592	4.23	22.56	0.283	0.194	0	0.014
ANT24-3	24403	-56.9192	-62.3921	2008	4	9	4098	38.1	244	5.462	5.458	33.926	26.7701	1.582	3.94	22.37	0.273	0.149364	0	0.009
ANT24-3	24403	-56.9192	-62.3921	2008	4	9	4098	37.9	244	5.462	5.459	33.926	26.7703	NULL	NULL	NULL	NULL	NULL	NULL	NULL
ANT24-3	24403	-56.9192	-62.3921	2008	4	9	4098	23.6	244	5.434	5.433	33.909	26.7601	1.572	3.82	22.27	0.273	0.062329	0	0.006
ANT24-3	24403	-56.9192	-62.3921	2008	4	9	4098	8.6	244	5.429	5.429	33.91	26.7608	1.563	3.82	22.21	0.264	0.0547721	0	0.004
ANT24-3	24903	-56.1187	-63.7565	2008	4	10	4302	4252.7	249	0.684	0.352	34.692	27.8382	2.245	116.98	32.44	0.029	0.998021	0	0.058
ANT24-3	24903	-56.1187	-63.7565	2008	4	10	4302	4001.1	249	0.666	0.363	34.692	27.8378	2.235	120.37	32.47	0.029	0.597987	0	0.011
ANT24-3	24903	-56.1187	-63.7565	2008	4	10	4302	3699.2	249	0.754	0.48	34.699	27.836	2.235	120.47	32.48	0.02	0.497397	0	0.015
ANT24-3	24903	-56.1187	-63.7565	2008	4	10	4302	3497	249	0.827	0.572	34.703	27.8343	2.225	119.5	32.29	0.029	0.428029	0	0.008
ANT24-3	24903	-56.1187	-63.7565	2008	4	10	4302	2998.8	249	1.098	0.885	34.715	27.8239	2.216	115.2	32.14	0.02	0.45027	0	0.006
ANT24-3	24903	-56.1187	-63.7565	2008	4	10	4302	2498	249	1.477	1.303	34.725	27.8034	2.206	104.12	31.91	0.02	0.914108	0	0.03
ANT24-3	24903	-56.1187	-63.7565	2008	4	10	4302	1998.1	249	1.815	1.679	34.715	27.7679	2.235	96.19	32.24	0.02	0.824937	0	0.025
ANT24-3	24903	-56.1187	-63.7565	2008	4	10	4302	1749.3	249	1.902	1.785	34.708	27.7545	2.235	93.43	32.26	0.01	0.60943	0	0.016
ANT24-3	24903	-56.1187	-63.7565	2008	4	10	4302	1500.9	249	2.062	1.963	34.687	27.7236	2.274	89.34	32.71	0.01	0.933022	0	0.006
ANT24-3	24903	-56.1187	-63.7565	2008	4	10	4302	1250	249	2.261	2.179	34.639	27.6684	2.304	79.43	33.18	0.02	0.274944	0	0.003
ANT24-3	24903	-56.1187	-63.7565	2008	4	10	4302	1000.3	249	2.418	2.354	34.562	27.5917	2.362	72.61	34.04	0.02	0.269573	0	0.01
ANT24-3	24903	-56.1187	-63.7565	2008	4	10	4302	750.2	249	2.565	2.518	34.426	27.4696	NULL	NULL	NULL	NULL	NULL	NULL	NULL
ANT24-3	24903	-56.1187	-63.7565	2008	4	10	4302	499.7	249	2.54	2.51	34.228	27.3117	2.207	38.86	31.77	0.02	0.374307	0	0.055
ANT24-3	24903	-56.1187	-63.7565	2008	4	10	4302	399.9	249	2.519	2.496	34.158	27.2573	2.109	31.22	30.49	0.02	0.205037	0	0.005
ANT24-3	24903	-56.1187	-63.7565	2008	4	10	4302	300.4	249	2.631	2.613	34.113	27.2107	2.041	25.68	29.53	0.029	0.197826	0	0.008
ANT24-3	24903	-56.1187	-63.7565	2008	4	10	4302	249.4	249	2.331	2.317	34.03	27.1695	1.963	20.57	28.28	0.029	0.0778148	0	0.005
ANT24-3	24903	-56.1187	-63.7565	2008	4	10	4302	199.8	249	2.716	2.704	34.029	27.136	1.924	18.76	27.92	0.039	0.0961558	0	0.009
ANT24-3	24903	-56.1187	-63.7565	2008	4	10	4302	147.8	249	2.894	2.885	33.991	27.09	1.865	15.21	27.06	0.068	0.195313	0	0.003
ANT24-3	24903	-56.1187	-63.7565	2008	4	10	4302	100.5	249	4.072	4.065	33.903	26.9065	1.768	8.87	25.2	0.313	0.0862194	0	0.003
ANT24-3	24903	-56.1187	-63.7565	2008	4	10	4302	74.4	249	4.467	4.461	33.875	26.8428	1.699	5.87	24.38	0.273	0.0424115	0	0.002
ANT24-3	24903	-56.1187	-63.7565	2008	4	10	4302	58.6	249	4.562	4.558	33.87	26.8284	1.68	5.32	24.18	0.273	0.169356	0	0.006
ANT24-3	24903	-56.1187	-63.7565	2008	4	10	4302	39.1	249	4.566	4.563	33.87	26.8281	1.67	5.24	24.16	0.273	0.0902234	0	0.006
ANT24-3	24903	-56.1187	-63.7565	2008	4	10	4302	24	249	4.562	4.56	33.87	26.8284	1.67	5.24	24.34	0.264	0.327074	0	0.017
ANT24-3	24903	-56.1187	-63.7565	2008	4	10	4302	8.5	249	4.559	4.559	33.87	26.8283	1.66	5.23	24.14	0.273	0.0706925	0	NULL
ANT24-3	25006	-55.7015	-64.424	2008	4	11	3802	3724.9	250	0.705	0.43	34.696	27.837	NULL	NULL	NULL	NULL	0.699628	0	0.009
ANT24-3	25006	-55.7015	-64.424	2008	4	11	3802	3599.8	250	0.772	0.508	34.7	27.8356	NULL	NULL	NULL	NULL	0.363781	0	0.013
ANT24-3	25006	-55.7015	-64.424	2008	4	11	3802	3299.2	250	0.944	0.706	34.709	27.8304	NULL	NULL	NULL	NULL	0.343229	0	0.002
ANT24-3	25006	-55.7015	-64.424	2008	4	11	3802	2999.5	250	1.196	0.981	34.718	27.8201	NULL	NULL	NULL	NULL	0.823261	0	NULL
ANT24-3	25006	-55.7015	-64.424	2008	4	11	3802	2748.6	250	1.35	1.156	34.721	27.811	NULL	NULL	NULL	NULL	0.859535	0	0.039
ANT24-3	25006	-55.7015	-64.424	2008	4	11	3802	2498.6	250	1.519	1.344	34.723	27.799	NULL	NULL	NULL	NULL	1.5003	0	0.074
ANT24-3	25006	-55.7015	-64.424	2008	4	11	3802	2200.1	250	1.724	1.572	34.718	27.7785	NULL	NULL	NULL	NULL	1.94098	0	0.006
ANT24-3	25006	-55.7015	-64.424	2008	4	11	3802	2002.5	250	1.848	1.711	34.712	27.7636	NULL	NULL	NULL	NULL	0.409993	0	0.009
ANT24-3	25006	-55.7015	-64.424	2008	4	11	3802	1600.6	250	2.134	2.026	34.682	27.7147	NULL	NULL	NULL	NULL	0.373325	0	0.025
ANT24-3	25006	-55.7015	-64.424	2008	4	11	3802	1250.8	250	2.35	2.268	34.597	27.6275	NULL	NULL	NULL	NULL	0.284098	0	0.005
ANT24-3	25006	-55.7015	-64.424	2008	4	11	3802	1000.2	250	2.576	2.511	34.505	27.5336	NULL	NULL	NULL	NULL	0.96109	4	0.002
ANT24-3	25006	-55.7015	-64.424	2008	4	11	3802	901.2	250	2.633	2.574	34.456	27.4886	NULL	NULL	NULL	NULL	0.411628	0	0.005
ANT24-3	25006	-55.7015	-64.424	2008	4	11	3802	700.5	250	2.858	2.813	34.346	27.3796	NULL	NULL	NULL	NULL	0.498843	0	0.008
ANT24-3	25006	-55.7015	-64.424	2008	4	11	3802	500.1	250	3.01	2.978	34.191	27.2409	NULL	NULL	NULL	NULL	0.633543	0	0.021
ANT24-3	25006	-55.7015	-64.424	2008	4	11	3802	400.3	250	2.92	2.895	34.116	27.1892	NULL	NULL	NULL	NULL	0.517221	0	0.004
ANT24-3	25006	-55.7015	-64.424	2008	4	11	3802	301.5	250	3.235	3.215	34.063	27.1171	NULL	NULL	NULL	NULL	0.206304	0	0.015
ANT24-3	25006	-55.7015	-64.424	2008	4	11	3802	199.5	250	3.428	3.415	34.039	27.0798	NULL	NULL	NULL	NULL	0.076996	0	0
ANT24-3	25006	-55.7015	-64.424	2008	4	11	3802	149.6	250	3.635	3.625	34.017	27.0415	NULL	NULL	NULL	NULL	0.102393	0	0.006
ANT24-3	25006	-55.7015	-64.424	2008	4	11	3802	99.7	250	4.746	4.738	33.92	26.8488	NULL	NULL	NULL	NULL	0.0442273	0	0
ANT24-3	25006	-55.7015	-64.424	2008	4	11	3802	73.5	250	5.078	5.073	33.896	26.7917	NULL	NULL	NULL	NULL	0.624921	4	0.001
ANT24-3	25006	-55.7015	-64.424	2008	4	11	3802	58.6	250	5.085	5.08	33.896	26.7908	NULL	NULL	NULL	NULL	0.141158	0	0
ANT24-3	25006	-55.7015	-64.424	2008	4	11	3802	39.1	250	5.098	5.095	33.896	26.7891	NULL	NULL	NULL	NULL	0.474384	0	0.016
ANT24-3	25006	-55.7015	-64.424	2008	4	11	3802	26.4	250	5.098	5.096	33.896	26.7892	NULL	NULL	NULL	NULL	0.161845	0	0.046
ANT24-3	25006	-55.7015	-64.424	2008	4	11	3802	10.3	250	5.096	5.095	33.896	26.7891	NULL	NULL	NULL	NULL	3.77572	0	0.09
ANT24-3	25103	-55.333	-65.1761	2008	4	12	1634	1549.3	251	2.558	2.449	34.555	27.5787	2.431	76.92	35.2	0.02	0.435	0	0.004
ANT24-3	25103	-55.333	-65.1761	2008	4	12	1634	1475.5	251	2.551	2.449	34.556	27.579	2.44	77.44	35.16	0.02	0.38	0	0.003
ANT24-3	25103	-55.333	-65.1761	2008	4	12	1634	1399.5	251	2.55	2.454	34.555	27.5777	2.44	77.36	35.37	0.02	0.242	0	0.003
ANT24-3	25103	-55.333	-65.1761	2008	4	12	1634	1298.1	251	2.602	2.514	34.535	27.5569	2.44	74.49	35.28	0.02	0.484	0	0.011
ANT24-3	25103	-55.333	-65.1761	2008	4	12	1634	1199	251	2.702	2.62	34.501	27.5208	2.431	69.41	35.13	0.02	0.238	0	0.001
ANT24-3	25103	-55.333	-65.1761	2008	4	12	1634	1099.8	251	2.786	2.711	34.472	27.4897	2.421	64.26	35.03	0.02	0.429	0	0.011
ANT24-3	25103	-55.333	-65.1761	2008	4	12	1634	999.1	251	2.913	2.845	34.429	27.4429	2.382	58.09	34.52	0.01	NULL	NULL	NULL
ANT24-3	25103	-55.333	-65.1761	2008	4	12	1634	898.4	251	3.05	2.989	34.385	27.395	2.333	50.86	33.92	0.029	0.235	0	0.003
ANT24-3	25103	-55.333	-65.1761	2008	4	12	1634	793.6	251	3.142	3.088	34.318	27.3328	2.265	42.93	33.22	0.029	0.163	0	0
ANT24-3	25103	-55.333	-65.1761	2008	4	12	1634	693.1	251	3.51	3.461	34.295	27.279	2.197	36.74	32.2	0.01	0.125	0	0.006
ANT24-3	25103	-55.333	-65.1761	2008	4	12	1634	588.6	251	3.836	3.794	34.257	27.216	2.119	30.4	31.05	0.029	0.288	0	0.004
ANT24-3	25103	-55.333	-65.1761	2008	4	12	1634	506.3	251	4.142	4.105	34.208	27.1452	1.963	21.4	28.91	0.029	0.385	0	0.004
ANT24-3	25103	-55.333	-65.1761	2008	4	12	1634	403.9	251	4.388	4.358	34.128	27.0548	1.767	12.73	25.82	0.029	0.138	0	0
ANT24-3	25103	-55.333	-65.1761	2008	4	12	1634	349.3	251	4.593	4.567	34.132	27.0351	1.709	11.29	24.97	0.029	0.424	0	0.011
ANT24-3	25103	-55.333	-65.1761	2008	4	12	1634	298.2	251	4.779	4.756	34.132	27.0146	1.64	9.3	23.87	0.029	0.128	0	0.031
ANT24-3	25103	-55.333	-65.1761	2008	4	12	1634	248.5	251	4.942	4.923	34.139	27.001	1.592	8.2	23.1	0.029	0.195	0	0.001
ANT24-3	25103	-55.333	-65.1761	2008	4	12	1634	201.3	251	5.036	5.02	34.141	26.9921	1.562	7.62	22.62	0.029	0.035	0	0.009
ANT24-3	25103	-55.333	-65.1761	2008	4	12	1634	150.2	251	5.16	5.148	34.144	26.9796	1.543	7.21	22.21	0.029	0.119	0	0.003
ANT24-3	25103	-55.333	-65.1761	2008	4	12	1634	99.5	251	5.43	5.422	33.968	26.808	1.553	5.4	22.1	0.186	0.033	0	0.001
ANT24-3	25103	-55.333	-65.1761	2008	4	12	1634	79.2	251	5.453	5.446	33.951	26.7915	1.533	3.67	21.8	0.273	0.02	0	0.004
ANT24-3	25103	-55.333	-65.1761	2008	4	12	1634	58.6	251	5.451	5.446	33.951	26.7914	1.533	3.62	21.8	0.273	0.255	0	0.006
ANT24-3	25103	-55.333	-65.1761	2008	4	12	1634	38	251	5.45	5.447	33.951	26.7914	1.533	3.64	21.72	0.264	0.198	0	0.005
ANT24-3	25103	-55.333	-65.1761	2008	4	12	1634	25.2	251	5.449	5.447	33.95	26.791	1.523	3.67	21.7	0.273	0.078	0	0.002
ANT24-3	25103	-55.333	-65.1761	2008	4	12	1634	9.4	251	5.447	5.446	33.95	26.7908	1.523	3.68	21.73	0.273	0.24	0	0.002
ANT24-3	25201	-55.1283	-65.5317	2008	4	12	409	374.5	252	4.947	4.918	34.145	27.0065	1.572	8.3	22.89	0.029	NULL	NULL	NULL
ANT24-3	25201	-55.1283	-65.5317	2008	4	12	409	376.3	252	4.943	4.913	34.145	27.0073	1.582	8.56	23.04	0.029	0.138	0	0.003
ANT24-3	25201	-55.1283	-65.5317	2008	4	12	409	350	252	5.05	5.023	34.14	26.9911	1.562	8.05	22.62	0.039	0.102	0	0.011
ANT24-3	25201	-55.1283	-65.5317	2008	4	12	409	323.6	252	5.143	5.117	34.137	26.9777	1.553	7.66	22.45	0.039	0.135	0	0.001
ANT24-3	25201	-55.1283	-65.5317	2008	4	12	409	298.5	252	5.232	5.208	34.135	26.9654	1.543	7.32	22.33	0.039	0.101	0	0.007
ANT24-3	25201	-55.1283	-65.5317	2008	4	12	409	276.7	252	5.325	5.303	34.129	26.9497	1.523	6.88	22.01	0.059	0.114	0	0.01
ANT24-3	25201	-55.1283	-65.5317	2008	4	12	409	251.1	252	5.639	5.618	34.107	26.8943	1.514	6.51	21.94	0.098	0.104	0	0.004
ANT24-3	25201	-55.1283	-65.5317	2008	4	12	409	225.2	252	6.05	6.03	34.079	26.8211	1.494	5.43	21.36	0.166	0.054	0	0.003
ANT24-3	25201	-55.1283	-65.5317	2008	4	12	409	199.8	252	6.599	6.581	34.041	26.7195	1.445	4.08	20.37	0.215	NULL	NULL	NULL
ANT24-3	25201	-55.1283	-65.5317	2008	4	12	409	201	252	6.592	6.574	34.041	26.7206	1.436	4.09	20.3	0.225	0.208	0	0.005
ANT24-3	25201	-55.1283	-65.5317	2008	4	12	409	179.2	252	6.73	6.714	34.024	26.6888	1.436	4.07	20.03	0.225	NULL	NULL	NULL
ANT24-3	25201	-55.1283	-65.5317	2008	4	12	409	158.5	252	6.91	6.895	34.005	26.6489	1.426	3.91	19.66	0.234	0.138	0	0.004
ANT24-3	25201	-55.1283	-65.5317	2008	4	12	409	139.5	252	7.201	7.188	33.978	26.5877	1.387	3.32	19.04	0.254	0.167	0	0.005
ANT24-3	25201	-55.1283	-65.5317	2008	4	12	409	121.5	252	7.813	7.801	33.896	26.4357	1.318	2.42	17.71	0.293	0.176	0	0.013
ANT24-3	25201	-55.1283	-65.5317	2008	4	12	409	100.1	252	8.14	8.13	33.849	26.3505	1.279	1.9	17.01	0.322	0.251	0	0.004
ANT24-3	25201	-55.1283	-65.5317	2008	4	12	409	89.8	252	8.213	8.204	33.827	26.3226	1.27	1.81	16.88	0.322	0.196	0	0.008
ANT24-3	25201	-55.1283	-65.5317	2008	4	12	409	79	252	8.3	8.292	33.761	26.2571	1.231	1.72	16.37	0.322	0.44	0	0.003
ANT24-3	25201	-55.1283	-65.5317	2008	4	12	409	69.9	252	8.323	8.316	33.743	26.2397	1.231	1.65	16.26	0.332	0.151	0	0.004
ANT24-3	25201	-55.1283	-65.5317	2008	4	12	409	59.1	252	8.335	8.329	33.723	26.2216	1.231	1.67	16.35	0.332	0.101	0	0.002
ANT24-3	25201	-55.1283	-65.5317	2008	4	12	409	49	252	8.429	8.424	33.665	26.1622	1.201	1.65	16.18	0.342	0.23	0	0.014
ANT24-3	25201	-55.1283	-65.5317	2008	4	12	409	38.8	252	8.779	8.775	33.537	26.0077	1.163	1.52	15.44	0.401	0.425	0	0.011
ANT24-3	25201	-55.1283	-65.5317	2008	4	12	409	23.2	252	9.067	9.064	33.273	25.7562	1.104	1.44	14.14	0.489	NULL	NULL	NULL
ANT24-3	25201	-55.1283	-65.5317	2008	4	12	409	22.8	252	9.186	9.184	33.114	25.6129	1.065	1.38	13.51	0.547	1.003	0	0.025
ANT24-3	25201	-55.1283	-65.5317	2008	4	12	409	9.8	252	9.115	9.114	32.784	25.3656	0.968	1.28	11.52	0.626	2.644	0	0.03
