# Supplementary material for: Dissolved Fe across the Weddell Sea and Drake Passage: impact of DFe on nutrient uptake
Source: Copernicus journal article supplement (doi:10.5194/bg-11-651-2014), 2014-02-06
Supplement: Supplementary file 3 [file Electr_Suppl_table_S1_ANT_XXIV-3_Microscopic_counts__BIOVOLUMES.xls]

## Sheet: template
		Biovolume formulas	0	(Size * Factor 1)
			1	(Size * Factor 1)^2* Factor 2
			2	(Size * Factor 1)^3* Factor 2
Species code	Trophic level	Species	Cells (per L Seawater)	Quantity to be measured	Average measured	Defaultdimension	Biovolume formula	Biovolumefactor (F1)	Biovolumefactor (F2)	result
5231301000	1	Actinocyclus/Azpeitia		diameter		50	1	3.758	1	0
523112100	1	Asteromphalus sp		diameter		37	2	0.6	1	0
5231502000	1	Chaetoceros sp. (small < 10 um)		breedte cel		10	2	0.7	1	0
523150250	1	Chaetoceros sp. (big > 10 um)		breedte cel		15	2	0.7	1	0
523150263	1	Chaetoceros aequatorialis		breedte cel		25	2	0.5	1	0
5231502040	1	Chaetoceros atlanticus		nd		15	2	1	1	0
5231502560	1	Chaetoceros bulbosum		breedte cel		28	2	0.7	1	0
523150254	1	Chaetoceros castracanei		breedte		15	2	0.7	1	0
5231502100	1	Chaetoceros convolutus		diameter cel		20	2	1	1	0
523150257	1	Chaetoceros criophilus		breedte cel		20	2	0.7	1	0
5231502510	1	Chaetoceros curvisetus		nd		20	2	0.5	2	0
523150251	1	Chaetoceros dichaeta		breedte		26	2	0.7	1	0
5231502622	1	Chaetoceros neglectus		breedte cel		12	1	5	1	0
523150252	1	Chaetoceros peruvianus		breedte		21	2	0.7	1	0
5231000002	1	Centrales		diameter		20	2	0.9	0.92	0
523140103	1	Corethron inerme		diameter		35	2	1.6	1	0
5231401010	1	Corethron criophilum		diameter		12	2	1.988	1	0
5232602010	1	Cylindrotheca closterium/Nitzschia longissima		lengte		60	2	0.1	1	0
523140801	1	Dactyliosolen antarcticus		diameter		50	2	1.2	1	0
523140802	1	Dactyliosolen tenuijunctus		diameter		9	2	1.465	1	0
5232402000	1	Entomoneis		lengte		50	2	1	2.3	0
5232108315	1	Fragilariopsis kerguelensis cel 20-50 æm		lengte		35	2	0.301	1	0
523210836	1	Fragilariopsis rhombica		lengte cel		20	2	0.301	1	0
523210800	1	Fragilariopsis sp (small)		lengte cel		15	2	0.25	1	0
523210800	1	Fragilariopsis sp		lengte cel		25	2	0.25	1	0
523140303	1	Guinardia sp.		breedte		8	2	1.988	1	0
5232421700	1	Haslea		lengte		120	2	0.174	1	0
5231405030	1	Leptocylindrus mediterraneus		diameter		20	2	1.988	1	0
5232432010	1	Membraneis challengeri		lengte cel		175	0	11.8	1	0
5232417000	1	Navicula		lengte		20	2	0.3	0.7	0
5232604000	1	Nitzschia		lengte		25	2	0.2	0.5	0
5232000001	1	Pennales		lengte		30	2	0.263	1	0
5232429020	1	Plagiotropis gaussi		lengte cel		50	2	0.1	1	0
5231406010	1	Proboscia alata		breedte		10	2	3.282	1	0
		Proboscia truncata		nd		45	2	1	8	0
5232606000	1	Pseudo-nitzschia		lengte cel		100	2	0.094	1	0
523140624	1	Rhizosolenia chunii		breedte		10	2	1.988	1	0
5231406000	1	Rhizosolenia		lengte		22	2	0.316	1	0
5231112000	1	Thalassiosira		diameter		30	2	0.7	1	0
523212201	1	Thalassiothrix antarctica		lengte		3000	0	9	1	0
		Trichotoxon reinboldii		lengte		3000	0	9	1	0
900000323	1	Chlorophyceae		lengte		15	2	0.5	1	0
6621100000	1	Cryptophyceae		lengte cel		10	2	0.3	1	0
9999930006	2	Globule not det. (< 10um)		diameter		6	2	0.8	1	0
9999930002	2	Globule not det. (> 10um)		diameter		20	2	0.8	1	0
5214102002	1	Phaeocystis sp.		diameter cel		5	2	0.8	0.7	0
5214102002	1	Phaeocystis like		diameter cel		5	2	0.8	0.7	0
5214102003	1	Phaeocystis kolonie		diameter cel		5	2	0.8	0.7	0
5140000000	1	Prasinophyceae		lengte cel		5	2	0.5	1	0
		Choanoflagellates
5211901000	1	Dictyocha		diameter zonder stekels		40	2	0.6	1	0
5252703000	0	Protoperidinium		diameter		30	2	0.75	1	0
5250000003	2	Dinophyceae nondet		breedte		10	2	0.5	8	0
5251102000	1	Prorocentrum		nd		20	2	0.5	2	0
5253101000	1	Ceratium		nd		40	2	0.5	6	0
100000004	0	Ciliata non det		lengte		80	2	0.7	1	0
1730000000	0	Copepoda		lengte carpax		200	2	0.2	1	0

## Sheet: 150
ANT XXIV-3	Transect 9
Sample	21													1157.62
Station	150 -1											biovolume/cell	3408.33	7120.22
General remarks
													476440
			Counts				Biovolume
		cells per 1 ml sample	cells per ml seawater	%	measurement	measurement	Average (magnification corrected)	Default dimension	BV formula	BV factor (F1)	BV factor (F2)	Biovolume (um3)	Biovolume*cells per ml		% based on BV
Diatomeen:	Actinocyclus/ Azpeitia	55.8999	0.690038	0.427543	diameter	diameter	33.3333	50	1	3.758	1	15691.7	10827.9	15691.7	2.27267
	Asteromphalus sp.			0	diameter	diameter	37	37	2	0.6	1	10941	0		0
	Chaetoceros sp.(small < 10 um)	670.799	8.28045	5.13052	breedte cel	Width cell	7	7	2	0.7	1	117.649	974.187	117.649	0.204472
	Chaetoceros sp.(big > 10 um)	1192.53	14.7208	9.12092	breedte cel	Width cell	15	15	2	0.7	1	1157.62	17041.2	1157.62	3.57677
	Chaetoceros atlanticus			0	breedte cel	Width cell	15	15	2	1	1	3375	0		0
	Chaetoceros bulbosus			0	breedte cel	Width cell	28	28	2	0.7	1	7529.54	0		0
	Chaetoceros curvatus	37.2666	0.460025	0.285029	breedte cel	Width cell	15	15	2	0.7	1	1157.62	532.536	1157.62	0.111774
	Chaetoceros convolutus			0	breedte cel	Width cell	20	20	2	1	1	8000	0		0
	Chaetoceros criophilum	33.3333	0.411472	0.254946	breedte cel	Width cell	29.6667	20	2	0.7	1	8955.72	3685.03	8955.72	0.773451
	Chaetoceros dichaeta	875.766	10.8106	6.69818	breedte cel	Width cell	15.25	26	2	0.7	1	1216.48	13150.8	1216.48	2.76023
	Chaetoceros peruvianus			0	breedte cel	Width cell	21	21	2	0.7	1	3176.52	0		0
	Centrales not det	484.466	5.98033	3.70537	diameter	diameter	20	20	2	0.9	0.92	5365.44	32087.1	5365.44	6.73476
	Corethron inerme			0	diameter	diameter	35	35	2	1.6	1	175616	0		0
	Corethron pennatum	260.866	3.22018	1.9952	diameter	diameter	13.2381	12	2	1.988	1	18227.4	58695.5	18227.4	12.3196	12.3196
	Cylindrotheca closterium/ Nitzschia longissima	540.366	6.67036	4.13292	lengte	Length	70.2333	60	2	0.1	1	346.441	2310.89	346.441	0.485033
	Dactyliosolen antarcticus			0	diameter	diameter	50	50	2	1.2	1	216000	0		0
	Dactyliosolen tenuijunctus	1621.1	20.0111	12.3988	diameter	diameter	8	9	2	1.465	1	1609.84	32214.7	1609.84	6.76154
	Entomoneis sp.			0	lengte	Length	50	50	2	1	2.3	287500	0		0
	Fragilariopsis kerguelensis	633.533	7.82043	4.84549	lengte	Length	33.6333	35	2	0.301	1	1037.55	8114.09	1037.55	1.70307
	Fragilariopsis rhombica/seperanda	149.067	1.8401	1.14012	lengte	Length	20	20	2	0.301	1	218.167	401.45	218.167	0.0842603
	Fragilariopsis curta			0	lengte	Length	25	25	2	0.25	1	244.141	0		0
	Fragilariopsis spp.	1788.8	22.0812	13.6814	lengte	Length	15	15	2	0.25	1	52.7344	1164.44	52.7344	0.244404
	Guinardia sp.	18.6333	0.230013	0.142514	breedte cel	Width cell	6.66667	8	2	1.988	1	2327.96	535.46	2327.96	0.112388
	Haslea trompii	18.6333	0.230013	0.142514	lengte	Length	60	120	2	0.174	1	1137.89	261.73	1137.89	0.0549345
	Leptocylindrus mediterraneus (with epyphyte)			0	diameter	diameter	20	20	2	1.988	1	62854.9	0		0
	Leptocylindrus mediterraneus (without)	223.6	2.76015	1.71017	diameter	diameter	20.5556	20	2	1.988	1	68239.7	188352	68239.7	39.5332	39.5332
	Membraneis imposter			0	lengte	Length	175	175	0	11.8	1	2065	0		0
	Navicula sp.	223.6	2.76015	1.71017	lengte	Length	70	20	2	0.3	0.7	6482.7	17893.2	6482.7	3.75561
	Nitzschia sp.	55.8999	0.690038	0.427543	lengte	Length	64.4444	25	2	0.2	0.5	1070.57	738.736	1070.57	0.155053
	Pennates not det	987.566	12.1907	7.55326	nd	nd	30	30	2	0.263	1	491.169	5987.68	491.169	1.25675
	Plagiotropis gaussii			0	breedte	breedte	50	50	2	0.1	1	125	0		0
	Proboscia alata	55.8999	0.690038	0.427543	breedte	breedte	6.22222	10	2	3.282	1	8516.33	5876.59	8516.33	1.23344
	Proboscia truncata			0	breedte	breedte	45	45	2	1	8	729000	0		0
	Pseudonitzschia sp.	316.766	3.91021	2.42275	nd	nd	100	100	2	0.094	1	830.584	3247.76	830.584	0.681673
	Rhizosolenia sp.			0	breedte	breedte	22	22	2	0.316	1	335.992	0		0
	Thalassiosira spp.	354.033	4.37024	2.70777	nd	nd	30	30	2	0.7	1	9261	40472.8	9261	8.49484
	Thalassiothrix antarctica	6.66667	0.0822944	0.0509891	lengte	Length	1656.67	3000	0	9	1	14910	1227.01	14910	0.257537
	Trichotoxon reinboldii	3.33333	0.0411472	0.0254946	lengte	Length	1446.67	3000	0	9	1	13020	535.736	13020	0.112446
Naked flagellates	Chlorophyceae	204.966	2.53014	1.56766			10	10	2	0.5	1	125	316.267	125	0.0663814
	Cryptophyceae	167.7	2.07011	1.28263			7.5	7.5	2	0.3	1	11.3906	23.5799	11.3906	0.00494919
	Globule not det. (< 10 um)	1099.37	13.5707	8.40835			7.5	7.5	2	0.8	1	216	2931.28	216	0.615247
	Globule not det. (> 10 um)	260.866	3.22018	1.9952			12.5	12.5	2	0.8	1	1000	3220.18	1000	0.675883
	Phaeocystis sp.			0			5	5	2	0.8	0.7	44.8	0		0
	Phaeocystis-like	130.433	1.61009	0.997601			5	5	2	0.8	0.7	44.8	72.1319	44.8	0.0151398
	Prasinophyceae			0			5	5	2	0.5	1	15.625	0		0
	Choanoflagellate	37.2666	0.460025	0.285029			5	5	2	0.5	1	15.625	7.18789	15.625	0.00150867
Silicoflagellates:	Dictyocha speculum	223.6	2.76015	1.71017	diameter zonder	diameter zonder	24.3333	40	2	0.6	1	3112.14	8589.96	3112.14	1.80295
Dinoflagellates:	Protoperidinium spp. (heterotroph)			0			30	30	2	0.75	1	11390.6	0		0
	Naked dinos	316.766	3.91021	2.42275			10	10	2	0.5	8	1000	3910.21	1000	0.820715
	Prorocentrum spp.			0			20	20	2	0.5	2	2000	0		0
	Ceratium sp.	18.6333	0.230013	0.142514			40	40	2	0.5	6	48000	11040.6	48000	2.31731
Ciliates:	Tintinnids (heterotroph)	0	0	0			80	80	2	0.7	1	175616	0		0
Zooplankton:	Copepod larvae	6.66667	0.0822944	0.0509891
				100
			Counts
		cells per 1 ml sample	cells per ml seawater	%											100
Diatoms		10608.4	130.952	93.6799
Chlorophytes		204.966	2.53014	0.0663814								Counts
Cryptophytes		167.7	2.07011	0.00494919							cells per 1 ml sample	cells per ml seawater	%
Globule not det. > 10 um		1099.37	13.5707	0.615247					Small (< 1000 um3)				5.31148
Globule not det. < 10 um		260.866	3.22018	0.675883					Medium (1001 - 5000 um3)				16.9838
Phaeocystis sp.				0					Large (> 5000 um3)				77.8049
Phaeocystis-like		130.433	1.61009	0.0151398
Prasinophytes				0					total		0		100.1
Silicoflagellates		223.6	2.76015	1.80295
Dinoflagellates		335.4	4.14023	3.13803
Ciliates	Tintinnids (heterotroph)	0	0	0
Copepod larvae		6.66667	0.0822944	0.0509891

## Sheet: 161
ANT XXIV-3	Transect 11. T0 Exp 2
Sample	29													3176.52
Station	161-3											biovolume/cell	8271.6	23246.6
General remarks	veel F. kerguelensis, counted half of the counting chamber											23280.7
													517003
	Diatomeen:		Counts				Biovolume
		cells per 1 ml sample	cells per ml seawater	%	measurement	measurement	Average (magnification corrected)	default	BV formula	BV factor (F1)	BV factor (F2)	Biovolume (um3)	Biovolume*cells per ml		% based on BV
Diatomeen:	Actinocyclus/ Azpeitia	33.3333	0.308356	0.395101	diameter	diameter	84.6667	50	1	3.758	1	101237	31217	101237	6.03807
	Asteromphalus sp.	6.66666	0.0616712	0.0790202	diameter	diameter	26.6667	37	2	0.6	1	4096	252.605	4096	0.0488595
	Chaetoceros sp.(small < 10 um)	766.666	7.09219	9.08732	breedte cel	Width cell	7	7	2	0.7	1	117.649	834.389	117.649	0.16139
	Chaetoceros sp.(big > 10 um)			0	breedte cel	Width cell	15	15	2	0.7	1	1157.62	0		0
	Chaetoceros atlanticus	253.333	2.34351	3.00277	breedte cel	Width cell	16.6667	20	2	1	1	4629.63	10849.6	4629.63	2.09855
	Chaetoceros bulbosus			0	breedte cel	Width cell	28	28	2	0.7	1	7529.54	0		0
	Chaetoceros castracanei	20	0.185014	0.23706	breedte cel	Width cell	15	15	2	0.7	1	1157.62	214.176	1157.62	0.0414265
	Chaetoceros convolutus			0	breedte cel	Width cell	20	20	2	1	1	8000	0		0
	Chaetoceros criophilum	150	1.3876	1.77795	breedte cel	Width cell	21	20	2	0.7	1	3176.52	4407.75	3176.52	0.852558
	Chaetoceros dichaeta	59.9999	0.555041	0.711181	breedte cel	Width cell	20	26	2	0.7	1	2744	1523.03	2744	0.294589
	Chaetoceros peruvianus			0	breedte cel	Width cell	21	21	2	0.7	1	3176.52	0		0
	Centrales not det	213.333	1.97348	2.52864	diameter	diameter	20	20	2	0.9	0.92	5365.44	10588.6	5365.44	2.04807
	Corethron inerme			0	diameter	diameter	35	35	2	1.6	1	175616	0		0
	Corethron pennatum	79.9999	0.740055	0.948242	diameter	diameter	19.1667	12	2	1.988	1	55320.9	40940.5	55320.9	7.9188
	Cylindrotheca closterium/ Nitzschia longissima	806.666	7.46222	9.56144	lengte	Length	60	60	2	0.1	1	216	1611.84	216	0.311766
	Dactyliosolen antarcticus	13.3333	0.123342	0.15804	diameter	diameter	35	50	2	1.2	1	74088	9138.2	74088	1.76753
	Dactyliosolen tenuijunctus	393.333	3.6386	4.66219	diameter	diameter	9.66667	9	2	1.465	1	2840.16	10334.2	2840.16	1.99887
	Entomoneis sp.	6.66666	0.0616712	0.0790202	lengte	Length	50	50	2	1	2.3	287500	17730.5	287500	3.42947
	Fragilariopsis kerguelensis	1126.67	10.4224	13.3544	lengte	Length	37.3333	35	2	0.301	1	1419.02	14789.7	1419.02	2.86066
	Fragilariopsis rhombica/seperanda	53.3333	0.49337	0.632161	lengte	Length	20	20	2	0.301	1	218.167	107.637	218.167	0.0208194
	Fragilariopsis curta			0	lengte	Length	25	25	2	0.25	1	244.141	0		0
	Fragilariopsis spp.	746.666	6.90718	8.85026	lengte	Length	20	20	2	0.25	1	125	863.397	125	0.167
	Guinardia sp.	66.6666	0.616712	0.790202	breedte cel	Width cell	8	8	2	1.988	1	4022.71	2480.86	4022.71	0.479853
	Haslea trompii	73.3333	0.678384	0.869222	lengte	Length	120	120	2	0.174	1	9103.15	6175.42	9103.15	1.19447
	Leptocylindrus mediterraneus (with epyphyte)	13.3333	0.123342	0.15804	diameter	diameter	20	20	2	1.988	1	62854.9	7752.68	62854.9	1.49954
	Leptocylindrus mediterraneus (without)	233.333	2.15849	2.76571	diameter	diameter	20.6667	20	2	1.988	1	69352.2	149696	69352.2	28.9546
	Membraneis imposter	20	0.185014	0.23706	lengte	Length	100	100	0	11.8	1	1180	218.316	1180	0.0422272
	Navicula sp.	300	2.77521	3.55591	lengte	Length	68	35	2	0.3	0.7	5942.76	16492.4	5942.76	3.19
	Nitzschia sp.	33.3333	0.308356	0.395101	lengte	Length	75	75	2	0.2	0.5	1687.5	520.351	1687.5	0.100648
	Pennates not det	220	2.03515	2.60766	nd	nd	30	30	2	0.263	1	491.169	999.603	491.169	0.193346
	Plagiotropis gaussii	6.66666	0.0616712	0.0790202	breedte	breedte	50	50	2	0.1	1	125	7.7089	125	0.00149107
	Proboscia alata	99.9999	0.925068	1.1853	breedte	breedte	15.7778	8	2	3.282	1	138852	128448	138852	24.8447
	Proboscia truncata	46.6666	0.431699	0.553141	breedte	breedte	8	8	2	3.282	1	18100.3	7813.87	18100.3	1.51138
	Pseudonitzschia sp.	420	3.88529	4.97827	nd	nd	100	100	2	0.094	1	830.584	3227.06	830.584	0.624185
	Rhizosolenia sp.	13.3333	0.123342	0.15804	breedte	breedte	22	22	2	0.316	1	335.992	41.4421	335.992	0.00801583
	Thalassiosira spp.	79.9999	0.740055	0.948242	nd	nd	30	30	2	0.7	1	9261	6853.65	9261	1.32565
	Thalassiothrix antarctica			0	lengte	Length	3000	3000	0	9	1	27000	0		0
	Trichotoxon reinboldii	20	0.185014	0.23706	lengte	Length	1080.48		0	9	1	9724.29	1799.13	9724.29	0.347991
	Trachyneis aspera	6.66666	0.0616712	0.0790202	lengte	Length	135	135	2	0.3	0.7	46501.1	2867.78	46501.1	0.554693
Naked flagellates	Chlorophyceae	33.3333	0.308356	0.395101			10	10	2	0.5	1	125	38.5445	125	0.00745537
	Cryptophyceae	46.6666	0.431699	0.553141			7.5	7.5	2	0.3	1	11.3906	4.91732	11.3906	0.000951119
	Globule not det. (< 10 um)	826.666	7.64723	9.7985			7.5	7.5	2	0.8	1	216	1651.8	216	0.319496
	Globule not det. (> 10 um)	253.333	2.34351	3.00277			12.5	12.5	2	0.8	1	1000	2343.51	1000	0.453287
	Phaeocystis sp.			0			5	5	2	0.8	0.7	44.8	0		0
	Phaeocystis-like			0			5	5	2	0.8	0.7	44.8	0		0
	Prasinophyceae	53.3333	0.49337	0.632161			5	5	2	0.5	1	15.625	7.7089	15.625	0.00149107
	Choanoflagellate	426.666	3.94696	5.05729			5	5	2	0.5	1	15.625	61.6712	15.625	0.0119286
Silicoflagellates:	Dictyocha speculum	106.667	0.98674	1.26432	diameter zonder	diameter zonder	23.125	40	2	0.6	1	2671.15	2635.73	2671.15	0.50981
Dinoflagellates:	Protoperidinium spp. (heterotroph)			0			30	30	2	0.75	1	11390.6	0		0
	Naked dinos	213.333	1.97348	2.52864			15	15	2	0.5	8	3375	6660.49	3375	1.28829
	Prorocentrum spp.	59.9999	0.555041	0.711181	diameter	diameter	45.1852	20	2	0.5	2	23063.7	12801.3	23063.7	2.47605
	Ceratium sp.			0			40	40	2	0.5	6	48000	0		0
Ciliates:	Ciliates	26.6666	0.246685	0.316081			80	80	2	0.7	1	175616	43321.8	175616	8.37941
Ciliates:	Tintinnids (heterotroph)	6.66666	0.0616712	0.0790202			50	50	2	0.7	1	42875	2644.15	42875	0.511439
				100
			Counts				3000	5	21
		cells per 1 ml sample	cells per ml seawater	%											108.891
Diatoms		6383.33	59.0502	94.9312
Chlorophytes		33.3333	0.308356	0.00745537
Cryptophytes		46.6666	0.431699	0.000951119						Counts
Globule not det. > 10 um		826.666	7.64723	0.319496					cells per 1 ml sample	cells per ml seawater	%
Globule not det. < 10 um		253.333	2.34351	0.453287			Small (< 1000 um3)				2.28262
Phaeocystis sp.		0	0	0			Medium (1001 - 5000 um3)				10.6163
Phaeocystis-like		0	0	0			Large (> 5000 um3)				87.101
Prasinophytes		53.3333	0.49337	0.00149107
Flagellates not det		426.666	3.94696	0.0119286			total		0		100
Silicoflagellates		106.667	0.98674	0.50981
Dinoflagellates		273.333	2.52852	3.76434
Ciliates	Tintinnids (heterotroph)	34	0.31	8.89085

## Sheet: 167
ANT XXIV-3	Transect 12
Sample	30													1169.52
Station	167-2											biovolume/cell	8435.72	101244
General remarks												90226.7
													5.6119e+06
	Diatomeen:		Counts				Biovolume
		cells per 1 ml sample	cells per ml seawater	%	measurement	measurement	Average (magnification corrected)	Default dimension	BV formula	BV factor (F1)	BV factor (F2)	Biovolume (um3)	Biovolume*cells per ml		% based on BV
Diatomeen:	Actinocyclus/ Azpeitia			0	diameter	diameter	50	50	1	3.758	1	35306.4	0		0
	Asteromphalus sp.	50	0.625	0.0872768	diameter	diameter	26.6667	37	2	0.6	1	4096	2560	4096	0.0456173
	Chaetoceros sp.(small < 10 um)	3027.84	37.848	5.2852	breedte cel	Width cell	7	7	2	0.7	1	117.649	4452.77	117.649	0.0793452
	Chaetoceros sp.(big > 10 um)	5947.53	74.3442	10.3816	breedte cel	Width cell	15	15	2	0.7	1	1157.62	86062.7	1157.62	1.53357
	Chaetoceros atlanticus	550	6.875	0.960045	breedte cel	Width cell	17.6667	15	2	1	1	5513.96	37908.5	5513.96	0.675502
	Chaetoceros bulbosus	20	0.25	0.0349107	breedte cel	Width cell	11.6667	28	2	0.7	1	544.671	136.168	544.671	0.00242641
	Chaetoceros criophilum	160	2	0.279286	breedte cel	Width cell	26.4583	15	2	0.7	1	6353.04	12706.1	6353.04	0.226413
	Chaetoceros dichaeta	1405.78	17.5723	2.45384	breedte cel	Width cell	21.9608	20	2	1	1	10591.2	186111	10591.2	3.31636
	Chaetoceros flexuosus	70	0.875	0.122188	breedte cel	Width cell	23.3333	20	2	0.7	1	4357.37	3812.7	4357.37	0.0679395
	Chaetoceros negelectus	180	2.25	0.314196	breedte cel	Width cell	10	26	2	0.7	1	343	771.75	343	0.013752
	Chaetoceros peruvianus	60	0.75	0.104732	breedte cel	Width cell	14.4444	21	2	0.7	1	1033.71	775.279	1033.71	0.0138149
	Centrales not det	324.411	4.05514	0.566271	diameter	diameter	20	20	2	0.9	0.92	5365.44	21757.6	5365.44	0.387705
	Corethron inerme		0	0	diameter	diameter	35	35	2	1.6	1	175616	0		0
	Corethron pennatum	1060	13.25	1.85027	diameter	diameter	14.3333	12	2	1.988	1	23136.1	306554	23136.1	5.46256
	Cylindrotheca closterium/ Nitzschia longissima	12003.2	150.04	20.952	lengte	Length	76.8333	60	2	0.1	1	453.575	68054.4	453.575	1.21268
	Dactyliosolen antarcticus		0	0	diameter	diameter	50	50	2	1.2	1	216000	0		0
	Dactyliosolen tenuijunctus	16220.5	202.757	28.3136	diameter	diameter	8.16667	9	2	1.465	1	1712.57	347235	1712.57	6.18747
	Entomoneis sp./ Amphiprora	30	0.375	0.0523661	lengte	Length	50	50	2	1	2.3	287500	107812	287500	1.92114
	Fragilariopsis kerguelensis	670	8.375	1.16951	lengte	Length	21.6667	35	2	0.301	1	277.38	2323.06	277.38	0.0413953
	Fragilariopsis rhombica/seperanda	324.411	4.05514	0.566271	lengte	Length	20	20	2	0.301	1	218.167	884.698	218.167	0.0157647
	Fragilariopsis curta		0	0	lengte	Length	25	25	2	0.25	1	244.141	0		0
	Fragilariopsis spp.	1622.06	20.2757	2.83136	lengte	Length	15	15	2	0.25	1	52.7344	1069.23	52.7344	0.0190528
	Guinardia sp.	1081.37	13.5171	1.88757	breedte cel	Width cell	8	8	2	1.988	1	4022.71	54375.5	4022.71	0.968932
	Haslea trompii	108.137	1.35171	0.188757	lengte	Length	120	120	2	0.174	1	9103.15	12304.8	9103.15	0.219263
	Leptocylindrus mediterraneus (with epyphyte)		0	0	diameter	diameter	20	20	2	1.988	1	62854.9	0		0
	Leptocylindrus mediterraneus (without)	865.096	10.8137	1.51006	diameter	diameter	23.75	20	2	1.988	1	105254	1.13819e+06	105254	20.2817	20.2817
	Membraneis imposter	20	0.25	0.0349107	lengte	Length	86.6667	175	0	11.8	1	1022.67	255.667	1022.67	0.00455579
	Navicula sp.	560	7	0.9775	lengte	Length	20	20	2	0.3	0.7	151.2	1058.4	151.2	0.0188599
	Nitzschia sp.	108.137	1.35171	0.188757	lengte	Length	25	25	2	0.2	0.5	62.5	84.482	62.5	0.00150541
	Pennates not det	4541.75	56.7719	7.9278	nd	nd	30	30	2	0.263	1	491.169	27884.6	491.169	0.496884
	Plagiotropis gaussii	70	0.875	0.122188	lengte	Length	105.714	50	2	0.1	1	1181.41	1033.73	1181.41	0.0184204
	Proboscia alata	160	2	0.279286	breedte	breedte	15.625	10	2	3.282	1	134858	269715	134858	4.80613
	Proboscia truncata	70	0.875	0.122188	breedte	breedte	45		2	3.282	1	3.22146e+06	2.81878e+06	3.22146e+06	50.2286	50.2286
	Pseudonitzschia sp.	1189.51	14.8688	2.07633	nd	nd	100	100	2	0.094	1	830.584	12349.8	830.584	0.220065
	Rhizosolenia sp.		0	0	breedte	breedte	22	22	2	0.316	1	335.992	0		0
	Thalassiosira spp.	216.274	2.70343	0.377514	nd	nd	30	30	2	0.7	1	9261	25036.4	9261	0.446131
	Thalassiothrix antarctica	10	0.125	0.0174554	lengte	Length	1566.67	3000	0	9	1	14100	1762.5	14100	0.0314065
	Trichotoxon reinboldii	90	1.125	0.157098	lengte	Length	1526.22	3000	0	9	1	13736	15453	13736	0.275361
Naked flagellates	Chlorophyceae	540.685	6.75856	0.943785			10	10	2	0.5	1	125	844.82	125	0.0150541
	Cryptophyceae	216.274	2.70343	0.377514			7.5	7.5	2	0.3	1	11.3906	30.7937	11.3906	0.000548721
	Globule not det. (< 10 um)	648.822	8.11028	1.13254			7.5	7.5	2	0.8	1	216	1751.82	216	0.0312161
	Globule not det. (> 10 um)	756.959	9.46199	1.3213			12.5	12.5	2	0.8	1	1000	9461.99	1000	0.168606
	Phaeocystis sp.	1189.51	14.8688	2.07633			5	5	2	0.8	0.7	44.8	666.124	44.8	0.0118698
	Phaeocystis-like		0	0			5	5	2	0.8	0.7	44.8	0		0
	Prasinophyceae		0	0			5	5	2	0.5	1	15.625	0		0
Silicoflagellates:	Dictyocha speculum	580	7.25	1.01241	diameter zonder	diameter zonder	25	40	2	0.6	1	3375	24468.8	3375	0.436015
Dinoflagellates:	Protoperidinium spp. (heterotroph)		0	0			30	30	2	0.75	1	11390.6	0		0
	Naked dinos	432.548	5.40685	0.755028			10	10	2	0.5	8	1000	5406.85	1000	0.0963461
	Prorocentrum spp.			0			20	20	2	0.5	2	2000	0		0
	Ceratium sp.			0			40	40	2	0.5	6	48000	0		0
Ciliates:	Tintinnids (heterotroph)	108.137	1.35171	0.188757			80	80	2	0.7	1	175616	237382	175616	4.22998
				100			1566.67
			Counts				5							#VALUE!	104.23
		cells per 1 ml sample	cells per ml seawater	%			21.9608							#VALUE!
Diatoms		52816.1	660.201	99.2403
Chlorophytes		540.685	6.75856	0.0150541								Counts
Cryptophytes		216.274	2.70343	0.000548721							cells per 1 ml sample	cells per ml seawater	%
Globule not det. > 10 um		648.822	8.11028	0.0312161					Small (< 1000 um3)				2.44537
Globule not det. < 10 um		756.959	9.46199	0.168606					Medium (1001 - 5000 um3)				9.93802
Phaeocystis sp.		1189.51	14.8688	0.0118698					Large (> 5000 um3)				87.6028
Phaeocystis-like		0	0	0
Prasinophytes		0	0	0					total		0		99.9862
Silicoflagellates		580	7.25	0.436015
Dinoflagellates		432.548	5.40685	0.0963461
Ciliates	Tintinnids (heterotroph)	108.137	1.35171	4.22998

## Sheet: 178
ANT XXIV-3	Transect 13/ T0 Exp 3
Sample	31													2065
Station	178-8											biovolume/cell	7809.53	40702.6
General remarks	counting chamber counted half
													1.02639e+06
	Diatomeen:		Counts				Biovolume
		cells per 1 ml sample	cells per ml seawater	%	measurement	measurement	Average (magnification corrected)	Default dimension	BV formula	BV factor (F1)	BV factor (F2)	Biovolume (um3)	Biovolume*cells per ml		% based on BV
Diatomeen:	Actinocyclus/ Azpeitia	0	0	0	diameter	diameter	50	50	1	3.758	1	35306.4	0		0
	Asteromphalus sp.	26.6664	0.269985	0.11713	diameter	diameter	26.6667	37	2	0.6	1	4096	1105.86	4096	0.107742
	Chaetoceros sp.(small < 10 um)	1373.32	13.9042	6.03221	breedte cel	Width cell	7	7	2	0.7	1	117.649	1635.82	117.649	0.159375
	Chaetoceros sp.(big > 10 um)	1546.65	15.6591	6.79356	breedte cel	Width cell	15	15	2	0.7	1	1157.62	18127.4	1157.62	1.76613
	Chaetoceros atlanticus	26.6664	0.269985	0.11713	breedte cel	Width cell	15	15	2	1	1	3375	911.199	3375	0.0887768
	Chaetoceros bulbosus	53.3328	0.53997	0.234261	breedte cel	Width cell	28	28	2	0.7	1	7529.54	4065.72	7529.54	0.396118
	Chaetoceros curvisetus	319.997	3.23982	1.40556	breedte cel	Width cell	15	15	2	0.7	1	1157.62	3750.49	1157.62	0.365405
	Chaetoceros criophilum	133.332	1.34992	0.585652	breedte cel	Width cell	27	20	2	1	1	19683	26570.6	19683	2.58873
	Chaetoceros dichaeta	1813.32	18.359	7.96486	breedte cel	Width cell	21.1667	20	2	0.7	1	3252.76	59717.2	3252.76	5.81817
	Chaetoceros hendeyi	133.332	1.34992	0.585652	breedte cel	Width cell	16.6667	26	2	0.7	1	1587.96	2143.63	1587.96	0.208851
	Chaetoceros peruvianus	13.3332	0.134992	0.0585652	breedte cel	Width cell	21	21	2	0.7	1	3176.52	428.806	3176.52	0.041778
	Centrales not det	119.999	1.21493	0.527086	diameter	diameter	20	20	2	0.9	0.92	5365.44	6518.64	5365.44	0.635102
	Corethron inerme	13.3332	0.134992	0.0585652	diameter	diameter	35	35	2	1.6	1	175616	23706.8	175616	2.30972
	Corethron pennatum	519.995	5.2647	2.28404	diameter	diameter	13.8333	12	2	1.988	1	20798.4	109497	20798.4	10.6682
	Cylindrotheca closterium/ Nitzschia longissima	1053.32	10.6644	4.62665	lengte	Length	112	60	2	0.1	1	1404.93	14982.7	1404.93	1.45975
	Dactyliosolen antarcticus	0		0	diameter	diameter	50	50	2	1.2	1	216000	0		0
	Dactyliosolen tenuijunctus	573.328	5.80467	2.5183	diameter	diameter	11.6667	9	2	1.465	1	4992.9	28982.2	4992.9	2.82369
	Amphiprora/Entomoneis sp.	26.6664	0.269985	0.11713	lengte	Length	50	50	2	1	2.3	287500	77620.6	287500	7.56247
	Fragilariopsis kerguelensis	133.332	1.34992	0.585652	lengte	Length	38.6667	35	2	0.301	1	1576.56	2128.23	1576.56	0.207351
	Fragilariopsis rhombica/seperanda	13.3332	0.134992	0.0585652	lengte	Length	20	20	2	0.301	1	218.167	29.4509	218.167	0.00286936
	Fragilariopsis curta	0		0	lengte	Length	25	25	2	0.25	1	244.141	0		0
	Fragilariopsis spp.	1799.98	18.224	7.9063	lengte	Length	15	15	2	0.25	1	52.7344	961.03	52.7344	0.0936318
	Guinardia sp.	53.3328	0.53997	0.234261	breedte cel	Width cell	8	8	2	1.988	1	4022.71	2172.14	4022.71	0.211629
	Haslea trompii	39.9996	0.404977	0.175695	lengte	Length	120	120	2	0.174	1	9103.15	3686.57	9103.15	0.359177
	Leptocylindrus mediterraneus (with epyphyte)	0		0	diameter	diameter	20	20	2	1.988	1	62854.9	0		0
	Leptocylindrus mediterraneus (without)	146.665	1.48492	0.644217	diameter	diameter	26.9697	20	2	1.988	1	154127	228865	154127	22.298
	Membraneis imposter	13.3332	0.134992	0.0585652	lengte	Length	175	175	0	11.8	1	2065	278.759	2065	0.0271591
	Navicula sp.	186.665	1.88989	0.819912	lengte	Length	63.3333	20	2	0.3	0.7	4801.3	9073.95	4801.3	0.884062
	Nitzschia sp.	39.9996	0.404977	0.175695	lengte	Length	25	25	2	0.2	0.5	62.5	25.3111	62.5	0.00246602
	Pennates not det	933.324	9.44947	4.09956	nd	nd	30	30	2	0.263	1	491.169	4641.29	491.169	0.452194
	Plagiotropis gaussii	39.9996	0.404977	0.175695	breedte	breedte	50	50	2	0.1	1	125	50.6222	125	0.00493205
	Proboscia alata	26.6664	0.269985	0.11713	breedte	breedte	11.6667	10	2	3.282	1	56137.9	15156.4	56137.9	1.47667
	Proboscia truncata	39.9996	0.404977	0.175695	breedte	breedte	45	45	2	1	8	729000	295228	729000	28.7637
	Pseudonitzschia sp.	866.658	8.77451	3.80673	nd	nd	100	100	2	0.094	1	830.584	7287.96	830.584	0.710056
	Rhizosolenia sp.	0		0	breedte	breedte	22	22	2	0.316	1	335.992	0		0
	Thalassiosira spp.	306.664	3.10483	1.347	nd	nd	30	30	2	0.7	1	9261	28753.8	9261	2.80144
	Thalassiothrix antarctica	0		0	lengte	Length	3000	3000	0	9	1	27000	0		0
	Trichotoxon reinboldii	19.9998	0.202489	0.0878477	lengte	Length	1566.67	3000	0	9	1	14100	2855.09	14100	0.278167
Naked flagellates	Chlorophyceae	0		0			10	10	2	0.5	1	125	0		0
	Cryptophyceae	359.996	3.64479	1.58126			7.5	7.5	2	0.3	1	11.3906	41.5165	11.3906	0.00404489
	Globule not det. (< 10 um)	1639.98	16.6041	7.20351			7.5	7.5	2	0.8	1	216	3586.48	216	0.349426
	Globule not det. (> 10 um)	333.33	3.37481	1.46413			12.5	12.5	2	0.8	1	1000	3374.81	1000	0.328803
	Phaeocystis sp.	67	0.67	0.292826			5	5	2	0.8	0.7	44.8	30.016	44.8	0.00292442
	Phaeocystis-like	386.663	3.91478	1.69839			5	5	2	0.8	0.7	44.8	175.382	44.8	0.0170872
	Prasinophyceae	0	0	0			5	5	2	0.5	1	15.625	0		0
	Phaeocystis in colony	6667	67.4962	29.2826			5	5	2	0.8	0.7	44.8	3023.83	44.8	0.294608
Silicoflagellates:	Dictyocha speculum	146.665	1.48492	0.644217	diameter zonder	diameter zonder	23.3333	40	2	0.6	1	2744	4074.61	2744	0.396984
Dinoflagellates:	Protoperidinium spp. (heterotroph)	0	0	0			30	30	2	0.75	1	11390.6	0		0
	Naked dinos	680	6.88	3			10	10	2	0.5	8	1000	6880	1000	0.670309
	Prorocentrum spp.	26.6664	0.269985	0.11713			20	20	2	0.5	2	2000	539.97	2000	0.0526085
	Ceratium sp.	0		0			40	40	2	0.5	6	48000	0		0
Ciliates:	Ciliates	13.3332	0.134992	0.0585652			80	80	2	0.7	1	175616	23706.8	175616	2.30972
	Tintinnids (heterotroph)	39.9996	0.404977	0.175695			80	80	2	0.7	1	175616	71120.5	175616	6.92917
				100.013			3000							#DIV/0!
			Counts				5								106.929
		cells per 1 ml sample	cells per ml seawater	%			23.3333
Diatoms		12406.5	125.61	95.5735									Counts
Chlorophytes		0	0	0								cells per 1 ml sample	cells per ml seawater		%
Cryptophytes		359.996	3.64479	0.00404489						Small (< 1000 um3)		17253.9	121.691		2.42242
Globule not det. > 10 um		1639.98	16.6041	0.349426						Medium (1001 - 5000 um3)		2013.31	20.3839		14.4601
Globule not det. < 10 um		333.33	3.37481	0.328803						Large (> 5000 um3)					82.088
Phaeocystis sp.		6734	68	0.00292442						Giants		7333.99	74.2409
Phaeocystis-like		386.663	3.91478	0.0170872						total		26601.2			98.9705
Prasinophytes		0	0	0
Silicoflagellates		146.665	1.48492	0.396984
Dinoflagellates		706.666	7.14998	0.722917
Ciliates	Tintinnids (heterotroph)	53	0.53	9.23889

## Sheet: 191
ANT XXIV-3	Transect 15
Sample	39													3383.36
Station	191-2											biovolume/cell	7420.12	20263.7
General remarks												34936.4
													517148
	Diatomeen:		Counts				Biovolume
		cells per 1 ml sample	cells per ml seawater	%	measurement		Average (magnification corrected)	Default dimension	BV formula	BV factor (F1)	BV factor (F2)	Biovolume (um3)	Biovolume*cells per ml		% based on BV
Diatomeen:	Actinocyclus/ Azpeitia	90.1131	0.565327	0.725225			50	50	1	3.758	1	35306.4	19959.7	35306.4	3.85956
	Asteromphalus sp.			0			37	37	2	0.6	1	10941	0		0
	Chaetoceros sp.(small ca 10 um)	976.225	6.12437	7.85661			7	7	2	0.7	1	117.649	720.526	117.649	0.139327
	Chaetoceros sp.(big > 10 um)			0			15	15	2	0.7	1	1157.62	0		0
	Chaetoceros atlanticus	105.132	0.659548	0.846096	breedte cel	Width cell	24.7619	15	2	1	1	15182.8	10013.8	15182.8	1.93635
	Chaetoceros bulbosus			0			28	28	2	0.7	1	7529.54	0		0
	Chaetoceros castracanei	30.0377	0.188442	0.241742	breedte cel	Width cell	16.6667	15	2	0.7	1	1587.96	299.239	1587.96	0.0578634
	C. curvisetus	405.509	2.54397	3.26351	breedte cel	Width cell	18.4667	20	2	1	1	6297.46	16020.6	6297.46	3.09787
	Chaetoceros criophilum	30	0.188206	0.241438			20	20	2	0.7	1	2744	516.437	2744	0.0998624
	Chaetoceros dichaeta	510.641	3.20352	4.10961	breedte cel	Width cell	12	26	2	0.7	1	592.704	1898.74	592.704	0.367156
	Chaetoceros peruvianus			0			21	21	2	0.7	1	3176.52	0		0
	Centrales not det	165.207	1.03643	1.32958			20	20	2	0.9	0.92	5365.44	5560.92	5365.44	1.0753
	Corethron inerme	45.0565	0.282663	0.362613			35	35	2	1.6	1	175616	49640.2	175616	9.59884
	Corethron pennatum	150.188	0.942211	1.20871	diameter	diameter	13.8	12	2	1.988	1	20648.4	19455.2	20648.4	3.76201
	Cylindrotheca closterium			0			60	60	2	0.1	1	216	0		0
	Dactyliosolen antarcticus	105.132	0.659548	0.846096	diameter	diameter	18.5714	50	2	1.2	1	11068.3	7300.05	11068.3	1.4116
	Dactyliosolen tenuijunctus	570.716	3.5804	4.59309	diameter	diameter	6.66667	9	2	1.465	1	931.621	3335.58	931.621	0.644995
	Entomoneis sp.			0			50	50	2	1	2.3	287500	0		0
	Fragilariopsis kerguelensis	150.188	0.942211	1.20871	lengte	Length	33.3333	35	2	0.301	1	1010.03	951.665	1010.03	0.184022
	Fragilariopsis rhombica/seperanda	15.0188	0.0942211	0.120871			20	20	2	0.301	1	218.167	20.556	218.167	0.00397487
	Fragilariopsis curta	120.151	0.753769	0.966967			25	25	2	0.25	1	244.141	184.026	244.141	0.0355847
	Fragilariopsis spp.			0			15	15	2	0.25	1	52.7344	0		0
	Guinardia sp	15.0188	0.0942211	0.120871			8	8	2	1.988	1	4022.71	379.025	4022.71	0.0732913
	Haslea trompii			0			120	120	2	0.174	1	9103.15	0		0
	Leptocylindrus mediterraneus (with epyphyte)	105.132	0.659548	0.846096	diameter	diameter	16.0952	20	2	1.988	1	32759.8	21606.7	32759.8	4.17804
	Leptocylindrus mediterraneus (without)	555.697	3.48618	4.47222			20	20	2	1.988	1	62854.9	219124	62854.9	42.3715	42.3715
	Membraneis imposter			0			175	175	0	11.8	1	2065	0		0
	Navicula sp.	615.773	3.86307	4.95571	lengte	Length	70	20	2	0.3	0.7	6482.7	25043.1	6482.7	4.84254
	Nitzschia sp.	390.49	2.44975	3.14264			25	25	2	0.2	0.5	62.5	153.109	62.5	0.0296065
	Pennates not det	3829.81	24.0264	30.8221			30	30	2	0.263	1	491.169	11801	491.169	2.28194
	Plagiotropis gaussii	15.0188	0.0942211	0.120871			50	50	2	0.1	1	125	11.7776	125	0.00227742
	Proboscia alata	105.132	0.659548	0.846096	breedte	breedte	11.9048	10	2	3.282	1	59645.5	39339.1	59645.5	7.60693
	Proboscia truncata			0			45	45	2	1	8	729000	0		0
	Pseudonitzschia sp.	916.15	5.74749	7.37312			100	100	2	0.094	1	830.584	4773.77	830.584	0.923096
	Rhizosolenia sp.1			0			22	22	2	0.316	1	335.992	0		0
	Thalassiosira spp.	675.848	4.23995	5.43919			30	30	2	0.7	1	9261	39266.2	9261	7.59283
	Thalassiothrix antarctica	2	0.0125471	0.0160959			3000	3000	0	9	1	27000	338.77	27000	0.0655074
	Trichotoxon reinboldii	18	0.112923	0.144863	lengte	Length	982.222	3000	0	9	1	8840	998.243	8840	0.193028
Naked flagellates	Chlorophyceae			0			10	10	2	0.5	1	125	0		0
	Cryptophyceae	45.0565	0.282663	0.362613			7.5	7.5	2	0.3	1	11.3906	3.21971	11.3906	0.00062259
	Globule not det. SIZE?	961.206	6.03015	7.73574			7.5	7.5	2	0.8	1	216	1302.51	216	0.251865
	Globule not det.SIZE?			0			12.5	12.5	2	0.8	1	1000	0		0
	Phaeocystis sp.	30.0377	0.188442	0.241742			5	5	2	0.8	0.7	44.8	8.44221	44.8	0.00163246
	Phaeocystis-like			0			5	5	2	0.8	0.7	44.8	0		0
	Prasinophyceae			0			5	5	2	0.5	1	15.625	0		0
Silicoflagellates:	Dictyocha speculum	330.415	2.07287	2.65916	diameter zonder	diameter zonder	20.6667	40	2	0.6	1	1906.62	3952.17	1906.62	0.764225
Dinoflagellates:	Protoperidinium spp. (heterotroph)	30.0377	0.188442	0.241742			30	30	2	0.75	1	11390.6	2146.48	11390.6	0.41506
	Naked dinos	75.0942	0.471106	0.604354			10	10	2	0.5	8	1000	471.106	1000	0.0910968
	Prorocentrum spp.	120.151	0.753769	0.966967			20	20	2	0.5	2	2000	1507.54	2000	0.29151
	Ceratium sp.	30.0377	0.188442	0.241742			40	40	2	0.5	6	48000	9045.23	48000	1.74906
Ciliates:	Tintinnids (heterotroph)	90	0.57	0.7			80	80	2	0.7	1	175616	100101	175616	19.3564	19.3564
				99.9748			3000
			Counts				5
		cells per 1 ml sample	cells per ml seawater	%			20.6667
Diatoms		10713.4	67.2107	96.4349											119.356
Chlorophytes		0	0	0
Cryptophytes		45.0565	0.282663	0.00062259								Counts
Globule not det. > 10 um		961.206	6.03015	0.251865							cells per 1 ml sample	cells per ml seawater	%
Globule not det. < 10 um		0	0	0					Small (< 1000 um3)				4.68208
Phaeocystis sp.		30.0377	0.188442	0.00163246					Medium (1001 - 5000 um3)				1.47077
Phaeocystis-like		0	0	0					Large (> 5000 um3)				93.6153
Prasinophytes		0	0	0
Silicoflagellates		330.415	2.07287	0.764225					total		0		99.7682
Dinoflagellates		255.32	1.60176	2.54673
Ciliates	Tintinnids (heterotroph)	90	0.57	19.3564

## Sheet: 193
ANT XXIV-3	Transect 16/ T0 Exp 4
Sample	43													2025.62
Station	193-10											biovolume/cell	4505.62	20990.3
General remarks	0.3, counted 102 IF											24500.6
													613963
	Diatomeen:		Counts				Biovolume
		cells per 1 ml sample	cells per ml seawater	%	measurement		Average (magnification corrected)	Default dimension	BV formula	BV factor (F1)	BV factor (F2)	Biovolume (um3)	Biovolume*cells per ml		% based on BV
Diatomeen:	Actinocyclus/ Azpeitia			0	diameter	diameter	50	50	1	3.758	1	35306.4	0		0
	Asteromphalus sp.	63.61	0.400743	0.249574	diameter	diameter	37	37	2	0.6	1	10941	4384.55	10941	0.71414
	Chaetoceros sp.(small < 10 um)	1505.44	9.48426	5.90658	breedte cel	Width cell	7	7	2	0.7	1	117.649	1115.81	117.649	0.18174
	Chaetoceros sp.(big > 10 um)	1102.57	6.94622	4.32595	breedte cel	Width cell	15	15	2	0.7	1	1157.62	8041.12	1157.62	1.30971
	Chaetoceros atlanticus	318.05	2.00372	1.24787	breedte cel	Width cell	12.8889	15	2	1	1	2141.15	4290.25	2141.15	0.698781
	Chaetoceros bulbosus			0	breedte cel	Width cell	28	28	2	0.7	1	7529.54	0		0
	Chaetoceros castracanei			0	breedte cel	Width cell	15	15	2	0.7	1	1157.62	0		0
	Chaetoceros convolutus			0	breedte cel	Width cell	20	20	2	1	1	8000	0		0
	Chaetoceros criophilum	30	0.189	0.117705	breedte cel	Width cell	13.3333	20	2	0.7	1	813.037	153.664	813.037	0.0250282
	Chaetoceros dichaeta	911.743	5.74399	3.57722	breedte cel	Width cell	12.6667	26	2	0.7	1	697.078	4004.01	697.078	0.652158
	Chaetoceros peruvianus			0	breedte cel	Width cell	21	21	2	0.7	1	3176.52	0		0
	Centrales not det	678.507	4.2746	2.66212	diameter	diameter	20	20	2	0.9	0.92	5365.44	22935.1	5365.44	3.73558
	Corethron inerme			0	diameter	diameter	35	35	2	1.6	1	175616	0		0
	Corethron pennatum	21.2033	0.133581	0.0831913	diameter	diameter	13.3333	12	2	1.988	1	18623.7	2487.77	18623.7	0.405199
	Cylindrotheca closterium/ Nitzschia longissima	2035.52	12.8238	7.98636	lengte	Length	69.8333	60	2	0.1	1	340.556	4367.22	340.556	0.711316
	Dactyliosolen antarcticus			0	diameter	diameter	50	50	2	1.2	1	216000	0		0
	Dactyliosolen tenuijunctus	6318.59	39.8072	24.791	diameter	diameter	9.16667	9	2	1.465	1	2421.85	96407	2421.85	15.7024	15.7024
	Entomoneis sp.	21.2033	0.133581	0.0831913	lengte	Length	50	50	2	1	2.3	287500	38404.6	287500	6.2552
	Fragilariopsis kerguelensis	614.897	3.87385	2.41255	lengte	Length	45.3333	35	2	0.301	1	2540.69	9842.28	2540.69	1.60307
	Fragilariopsis rhombica/seperanda	169.627	1.06865	0.66553	lengte	Length	20	20	2	0.301	1	218.167	233.144	218.167	0.0379737
	Fragilariopsis curta			0	lengte	Length	25	25	2	0.25	1	244.141	0		0
	Fragilariopsis spp.	2268.76	14.2932	8.90147	lengte	Length	20	15	2	0.25	1	125	1786.65	125	0.291003
	Guinardia sp.	42.4067	0.267162	0.166383	breedte cel	Width cell	8	8	2	1.988	1	4022.71	1074.72	4022.71	0.175046
	Haslea trompii	84.8133	0.534324	0.332765	lengte	Length	120	120	2	0.174	1	9103.15	4864.03	9103.15	0.792236
	Leptocylindrus mediterraneus (with epyphyte)	42.4067	0.267162	0.166383	diameter	diameter	20	20	2	1.988	1	62854.9	16792.5	62854.9	2.73509
	Leptocylindrus mediterraneus (without)	869.337	5.47683	3.41084	diameter	diameter	20	20	2	1.988	1	62854.9	344245	62854.9	56.0694	56.0694
	Membraneis imposter			0	lengte	Length	175	175	0	11.8	1	2065	0		0
	Navicula sp.	233.237	1.46939	0.915104	lengte	Length	20	20	2	0.3	0.7	151.2	222.172	151.2	0.0361866
	Nitzschia sp.			0	lengte	Length	25	25	2	0.2	0.5	62.5	0		0
	Pennates not det	2583.24	16.206	10.0928	nd	nd	30	30	2	0.263	1	491.169	7959.9	491.169	1.29648
	Plagiotropis gaussii			0	breedte	breedte	50	50	2	0.1	1	125	0		0
	Proboscia alata	42.4067	0.267162	0.166383	breedte	breedte	10	10	2	3.282	1	35352.1	9444.76	35352.1	1.53833
	Proboscia truncata	21.2033	0.133581	0.0831913	breedte	breedte	6.66667	45	2	1	8	2370.37	316.637	2370.37	0.0515726
	Pseudonitzschia sp.	954.15	6.01115	3.74361	nd	nd	100	100	2	0.094	1	830.584	4992.77	830.584	0.813203
	Rhizosolenia sp.	42.4067	0.267162	0.166383	breedte	breedte	22	22	2	0.316	1	335.992	89.7644	335.992	0.0146205
	Thalassiosira spp.	212.033	1.33581	0.831913	nd	nd	30	30	2	0.7	1	9261	12370.9	9261	2.01493
	Thalassiothrix antarctica			0	lengte	Length	3000	3000	0	9	1	27000	0		0
	Trichotoxon reinboldii	6.66666	0.042	0.0261566	lengte	Length	1233.33	3000	0	9	1	11100	466.2	11100	0.075933
Naked flagellates	Chlorophyceae			0			10	10	2	0.5	1	125	0		0
	Cryptophyceae	84.8133	0.534324	0.332765			7.5	7.5	2	0.3	1	11.3906	6.08629	11.3906	0.000991313
	Globule not det. (< 10 um)	2756.43	17.3655	10.8149			7.5	7.5	2	0.8	1	216	3750.96	216	0.610942
	Globule not det. (> 10 um)	296.847	1.87014	1.16468			12.5	12.5	2	0.8	1	1000	1870.14	1000	0.304601
	Phaeocystis sp.			0			5	5	2	0.8	0.7	44.8	0		0
	Phaeocystis-like	402.863	2.53804	1.58063			5	5	2	0.8	0.7	44.8	113.704	44.8	0.0185197
	Prasinophyceae			0			5	5	2	0.5	1	15.625	0		0
Silicoflagellates:	Dictyocha speculum	360.457	2.27088	1.41425	diameter zonder	diameter zonder	21.1765	40	2	0.6	1	2051.23	4658.1	2051.23	0.758694
Dinoflagellates:	Protoperidinium spp. (heterotroph)			0			30	30	2	0.75	1	11390.6	0		0
	Naked dinos	318.05	2.00372	1.24787			10	10	2	0.5	8	1000	2003.72	1000	0.326358
	Prorocentrum spp.	21.2033	0.133581	0.0831913			20	20	2	0.5	2	2000	267.162	2000	0.0435144
	Ceratium sp.	0	0	0			40	40	2	0.5	6	48000	0		0
Ciliates:	Tintinnids (heterotroph)	63.61	0.400743	0.249574			80	80	2	0.7	1	175616	70376.9	175616	11.4627	11.4627
				100			3000
			Counts				5				111.463				111.463
		cells per 1 ml sample	cells per ml seawater	%			20
Diatoms		21194	133.454	97.9364
Chlorophytes		0	0	0
Cryptophytes		84.8133	0.534324	0.000991313									Counts
Globule not det. > 10 um		2756.43	17.3655	0.610942								cells per 1 ml sample	cells per ml seawater		%
Globule not det. < 10 um		296.847	1.87014	0.304601						Small (< 1000 um3)					5.32112
Phaeocystis sp.		0	0	0						Medium (1001 - 5000 um3)					20.3428
Phaeocystis-like		402.863	2.53804	0.0185197						Large (> 5000 um3)					74.3361
Prasinophytes		0	0	0
Silicoflagellates		360.457	2.27088	0.758694						total		0			100
Dinoflagellates		339.253	2.1373	0.369873
Ciliates	Tintinnids (heterotroph)	63.61	0.400743	11.4627

## Sheet: 198
ANT XXIV-3	Transect 17
Sample	44													2362.5
Station	198-4											biovolume/cell	2735.09	40238.1
General remarks	0.3 ml, counted 30 IF											40900.1
													518386
	Diatomeen:			Counts			Biovolume
		cells per 1 ml sample	cells per ml seawater	%	measurement		Average (magnification corrected)	Default dimension	BV formula	BV factor (F1)	BV factor (F2)	Biovolume (um3)	Biovolume*cells per ml		% based on BV
Diatomeen:	Actinocyclus/ Azpeitia	0	0	0		0	50	50	1	3.758	1	35306.4	0		0
	Asteromphalus sp.	60	0.533333	0.280978	diameter	diameter	29.3333	37	2	0.6	1	5451.78	2907.61	5451.78	0.560897
	Chaetoceros sp.(small < 10 um)	1167.88	10.3812	5.46914	diameter	diameter	7	7	2	0.7	1	117.649	1221.33	117.649	0.235603
	Chaetoceros sp.(big > 10 um)	1968.09	17.4942	9.21652	breedte cel	Width cell	15	15	2	0.7	1	1157.62	20251.7	1157.62	3.90668
	Chaetoceros atlanticus	124	1.10222	0.580688	breedte cel	Width cell	16.6667	15	2	1	1	4629.63	5102.88	4629.63	0.984378
	Chaetoceros bulbosus			0	breedte cel	Width cell	28	28	2	0.7	1	7529.54	0		0
	Chaetoceros castracanei			0	breedte cel	Width cell	15	15	2	0.7	1	1157.62	0		0
	Chaetoceros dichaeta	540.685	4.80609	2.53201	breedte cel	Width cell	13.8333	26	2	0.7	1	907.977	4363.82	907.977	0.841808
	Chaetoceros neglectus	44	0.391111	0.206051	breedte cel	Width cell	8.5	12	1	6.8	1	193101	75523.8	193101	14.569	14.569
	Chaetoceros peruvianus	4	0.0355556	0.0187319	breedte cel	Width cell	21	21	2	0.7	1	3176.52	112.943	3176.52	0.0217874
	Centrales not det	129.764	1.15346	0.607683	breedte cel	Width cell	20	20	2	0.9	0.92	5365.44	6188.83	5365.44	1.19386
	Corethron inerme	4	0.0355556	0.0187319	diameter	diameter	35	35	2	1.6	1	175616	6244.12	175616	1.20453
	Corethron pennatum	84	0.746667	0.393369	diameter	diameter	17.3333	12	2	1.988	1	40916.2	30550.8	40916.2	5.89344
	Cylindrotheca closterium/ Nitzschia longissima	1513.92	13.457	7.08963	diameter	diameter	52.5	60	2	0.1	1	144.703	1947.28	144.703	0.375642
	Dactyliosolen antarcticus	58	0.515556	0.271612	lengte	Length	26.6667	50	2	1.2	1	32768	16893.7	32768	3.25891
	Dactyliosolen tenuijunctus	5925.91	52.6747	27.7508	diameter	diameter	10.6667	9	2	1.465	1	3815.92	201002	3815.92	38.7746	38.7746
	Entomoneis sp.			0	diameter	diameter	50	50	2	1	2.3	287500	0		0
	Fragilariopsis kerguelensis	1962	17.44	9.18798	lengte	Length	30	35	2	0.301	1	736.314	12841.3	736.314	2.47717
	Fragilariopsis rhombica/seperanda	151.392	1.3457	0.708963	lengte	Length	20	20	2	0.301	1	218.167	293.589	218.167	0.0566351
	Fragilariopsis sp.	1773.45	15.764	8.305	lengte	Length	25	25	2	0.25	1	244.141	3848.63	244.141	0.742424
	Fragilariopsis sp. (small)	2205.99	19.6088	10.3306	lengte	Length	15	15	2	0.25	1	52.7344	1034.06	52.7344	0.199477
	Guinardia sp.			0	lengte	Length	8	8	2	1.988	1	4022.71	0		0
	Haslea trompii	43.2548	0.384487	0.202561	breedte cel	Width cell	120	120	2	0.174	1	9103.15	3500.04	9103.15	0.67518
	Leptocylindrus mediterraneus (with epyphyte)	10	0.0888889	0.0468297	lengte	Length	20	20	2	1.988	1	62854.9	5587.1	62854.9	1.07779
	Leptocylindrus mediterraneus (without)			0	diameter	diameter	20	20	2	1.988	1	62854.9	0		0
	Membraneis imposter	16	0.142222	0.0749275	diameter	diameter	175	175	0	11.8	1	2065	293.689	2065	0.0566544
	Navicula sp.	151.392	1.3457	0.708963	lengte	Length	50	20	2	0.3	0.7	2362.5	3179.23	2362.5	0.613293
	Nitzschia sp.	86.5096	0.768974	0.405122	lengte	Length	25	25	2	0.2	0.5	62.5	48.0609	62.5	0.00927125
	Pennates not det	562.312	4.99833	2.63329	lengte	Length	30	30	2	0.263	1	491.169	2455.03	491.169	0.47359
	Plagiotropis gaussii	32	0.284444	0.149855	nd	nd	50	50	2	0.1	1	125	35.5556	125	0.00685889
	Proboscia alata	14	0.124444	0.0655616	breedte	breedte	10.9524	10	2	3.282	1	46445.3	5779.85	46445.3	1.11497
	Proboscia truncata	2	0.0177778	0.00936594	breedte	breedte	45	45	2	1	8	729000	12960	729000	2.50007
	Pseudonitzschia sp.	302.784	2.69141	1.41793	breedte	breedte	100	100	2	0.094	1	830.584	2235.44	830.584	0.431231
	Rhizosolenia sp.			0	nd	nd	22	22	2	0.316	1	335.992	0		0
	Thalassiosira spp.	605.567	5.38282	2.83585	breedte	breedte	30	30	2	0.7	1	9261	49850.3	9261	9.61644
	Thalassiothrix antarctica			0	nd	nd	3000	3000	0	9	1	27000	0		0
	Trichotoxon reinboldii	2	0.0177778	0.00936594	lengte	Length	2666.67	3000	0	9	1	24000	426.667	24000	0.0823067
Naked flagellates	Chlorophyceae	64.8822	0.576731	0.303841			10	10	2	0.5	1	125	72.0913	125	0.0139069
	Cryptophyceae	237.901	2.11468	1.11408			7.5	7.5	2	0.3	1	11.3906	24.0875	11.3906	0.00464663
	Globule not det. (< 10 um)	454.175	4.03711	2.12689			7.5	7.5	2	0.8	1	216	872.017	216	0.168218
	Globule not det. (> 10 um)	497.43	4.4216	2.32945			12.5	12.5	2	0.8	1	1000	4421.6	1000	0.852955
	Phaeocystis sp.	21.6274	0.192244	0.10128			5	5	2	0.8	0.7	44.8	8.61251	44.8	0.00166141
	Phaeocystis-like	129.764	1.15346	0.607683			5	5	2	0.8	0.7	44.8	51.6751	44.8	0.00996845
	Prasinophyceae			0			5	5	2	0.5	1	15.625	0		0
Silicoflagellates:	Dictyocha speculum	12	0.106667	0.0561956			40	40	2	0.6	1	13824	1474.56	13824	0.284452
Dinoflagellates:	Protoperidinium spp. (heterotroph)	2	0.0177778	0.00936594			30	30	2	0.75	1	11390.6	202.5	11390.6	0.0390635
	Naked dinos	324.411	2.88365	1.51921			22.8889	10	2	0.5	8	11991.5	34579.4	11991.5	6.67058
	Prorocentrum spp.			0			20	20	2	0.5	2	2000	0		0
	Ceratium sp.			0			40	40	2	0.5	6	48000	0		0
Ciliates:	Tintinnids (heterotroph)	64.8822	0.576731	0.303841			80	80	2	0.7	1	175616	101283	175616	19.5382	19.5382
				100			3000
			Counts				5								119.538
		cells per 1 ml sample	cells per ml seawater	%			22.4444
Diatoms		19544.9	173.732	91.9545
Chlorophytes		64.8822	0.576731	0.0139069								Counts
Cryptophytes		237.901	2.11468	0.00464663							cells per 1 ml sample	cells per ml seawater	%
Globule not det. > 10 um		454.175	4.03711	0.168218					Small (< 1000 um3)				6.90107
Globule not det. < 10 um		497.43	4.4216	0.852955					Medium (1001 - 5000 um3)				44.3574
Phaeocystis sp.		21.6274	0.192244	0.00166141					Large (> 5000 um3)				48.7415
Phaeocystis-like		129.764	1.15346	0.00996845
Prasinophytes		0	0	0					total		0		100
Silicoflagellates		12	0.106667	0.284452
Dinoflagellates		324.411	2.88365	6.70964
Ciliates	Tintinnids (heterotroph)	64.8822	0.576731	19.5382

## Sheet: 204
ANT XXIV-3	Transect 18
Sample	48													4694.08
Station	204-1											biovolume/cell	3389.86	16132.4
General remarks	very diverse sample, nice for outreach, 0.3 ml, counted 30 IF											23272.7
													888388
	Diatomeen:		Counts				Biovolume
		cells per 1 ml sample	per ml seawater	%	measurement		Average (magnification corrected)	Default dimension	BV formula	BV factor (F1)	BV factor (F2)	Biovolume (um3)	Biovolume*cells per ml		% based on BV
Diatomeen:	Actinocyclus/ Azpeitia	39.9996	0.405018	0.10773	diameter	diameter	71.6667	50	1	3.758	1	72535.1	29378	72535.1	3.30689
	Asteromphalus sp.	33.333	0.337515	0.0897749	diameter	diameter	33	37	2	0.6	1	7762.39	2619.93	7762.39	0.294908
	Chaetoceros sp.(small < 10 um)	612.776	6.2047	1.65037	breedte cel	Width cell	7	7	2	0.7	1	117.649	729.977	117.649	0.0821687
	Chaetoceros sp.(big > 10 um)	973.233	9.85453	2.62118	breedte cel	Width cell	15	15	2	0.7	1	1157.62	11407.8	1157.62	1.28411
	Chaetoceros atlanticus	1117.42	11.3145	3.00951	breedte cel	Width cell	18.1667	15	2	1	1	5995.5	67835.9	5995.5	7.63583
	Chaetoceros bulbosus			0	breedte cel	Width cell	28	28	2	0.7	1	7529.54	0		0
	Chaetoceros curvatus	72.0913	0.729965	0.194162	breedte cel	Width cell	15	15	1	5	1	5625	4106.05	5625	0.462191
	Chaetoceros convolutus	9.9999	0.101255	0.0269325	breedte cel	Width cell	20	20	2	1	1	8000	810.036	8000	0.0911804
	Chaetoceros criophilum			0	breedte cel	Width cell	20	20	2	0.7	1	2744	0		0
	Chaetoceros dichaeta	396.502	4.01481	1.06789	breedte cel	Width cell	29.5	26	2	0.7	1	8805.62	35352.9	8805.62	3.97944
	Chaetoceros peruvianus			0	breedte cel	Width cell	21	21	2	0.7	1	3176.52	0		0
	Centrales not det	288.365	2.91986	0.776647	diameter	diameter	20	20	2	0.9	0.92	5365.44	15666.3	5365.44	1.76346
	Corethron inerme	13.3332	0.135006	0.03591	diameter	diameter	13.3333	35	2	1.6	1	9709.04	1310.78	9709.04	0.147546
	Corethron pennatum	9.9999	0.101255	0.0269325	diameter	diameter	13.3333	12	2	1.988	1	18623.7	1885.73	18623.7	0.212264
	Cylindrotheca closterium/ Nitzschia longissima	1874.37	18.9791	5.0482	lengte	Length	41.5	60	2	0.1	1	71.4734	1356.5	71.4734	0.152692
	Dactyliosolen antarcticus			0	diameter	diameter	50	50	2	1.2	1	216000	0		0
	Dactyliosolen tenuijunctus	6956.81	70.4416	18.7366	diameter	diameter	8.33333	9	2	1.465	1	1819.57	128174	1819.57	14.4276	14.4276
	Entomoneis sp.			0	lengte	Length	50	50	2	1	2.3	287500	0		0
	Fragilariopsis kerguelensis	1516.65	15.3569	4.08476	lengte	Length	20.6667	35	2	0.301	1	240.719	3696.71	240.719	0.416114
	Fragilariopsis rhombica/seperanda			0	lengte	Length	20	20	2	0.301	1	218.167	0		0
	Fragilariopsis spp.	3208.06	32.4834	8.64019	lengte	Length	25	25	2	0.25	1	244.141	7930.53	244.141	0.892687
	Fragilariopsis spp. (small)	1225.55	12.4094	3.30075	lengte	Length	15	15	2	0.25	1	52.7344	654.402	52.7344	0.0736617
	Guinardia sp.	144.183	1.45993	0.388323	breedte cel	Width cell	8	8	2	1.988	1	4022.71	5872.88	4022.71	0.661071
	Haslea trompii	72.0913	0.729965	0.194162	lengte	Length	120	120	2	0.174	1	9103.15	6644.98	9103.15	0.747981
	Leptocylindrus mediterraneus (with epyphyte)	72.0913	0.729965	0.194162	diameter	diameter	20	20	2	1.988	1	62854.9	45881.9	62854.9	5.16462
	Leptocylindrus mediterraneus (without)	720.913	7.29965	1.94162	diameter	diameter	19	20	2	1.988	1	53890.2	393380	53890.2	44.2801	44.2801
	Membraneis imposter	3.3333	0.0337515	0.00897749	lengte	Length	175	175	0	11.8	1	2065	69.6969	2065	0.00784532
	Navicula sp.	396.502	4.01481	1.06789	lengte	Length	58.4848	20	2	0.3	0.7	3780.87	15179.5	3780.87	1.70865
	Nitzschia sp.			0	lengte	Length	25	25	2	0.2	0.5	62.5	0		0
	Pennates not det	3568.52	36.1333	9.611	nd	nd	30	30	2	0.263	1	491.169	17747.5	491.169	1.99772
	Plagiotropis gaussii			0	breedte	breedte	50	50	2	0.1	1	125	0		0
	Proboscia alata	36.0457	0.364982	0.0970808	breedte	breedte	10	10	2	3.282	1	35352.1	12902.9	35352.1	1.4524
	Proboscia truncata	19.9998	0.202509	0.0538649	breedte	breedte	10	10	2	3.282	1	35352.1	7159.13	35352.1	0.805856
	Pseudonitzschia sp.	1441.83	14.5993	3.88323	nd	nd	100	100	2	0.094	1	830.584	12125.9	830.584	1.36494
	Rhizosolenia sp.			0	breedte	breedte	22	22	2	0.316	1	335.992	0		0
	Thalassiosira spp.	360.457	3.64982	0.970808	nd	nd	30	30	2	0.7	1	9261	33801	9261	3.80476
	Thalassiothrix antarctica			0	lengte	Length	3000	3000	0	9	1	27000	0		0
	Trichotoxon reinboldii	3.3333	0.0337515	0.00897749	lengte	Length	2866.67	3000	0	9	1	25800	870.789	25800	0.098019
Naked flagellates	Chlorophyceae	288.365	2.91986	0.776647			10	10	2	0.5	1	125	364.982	125	0.0410837
	Cryptophyceae	180.228	1.82491	0.485404			7.5	7.5	2	0.3	1	11.3906	20.7869	11.3906	0.00233984
	Globule not det. (< 10 um)	1946.47	19.7091	5.24236			7.5	7.5	2	0.8	1	216	4257.16	216	0.4792
	Globule not det. (> 10 um)	648.822	6.56968	1.74745			12.5	12.5	2	0.8	1	1000	6569.68	1000	0.739506
	Phaeocystis sp.	8470.73	85.7709	22.814			5	5	2	0.8	0.7	44.8	3842.54	44.8	0.432529
	Phaeocystis-like			0			5	5	2	0.8	0.7	44.8	0		0
	Prasinophyceae			0			5	5	2	0.5	1	15.625	0		0
Silicoflagellates:	Dictyocha speculum	36.6663	0.371267	0.0987524	diameter zonder	diameter zonder	40	40	2	0.6	1	13824	5132.39	13824	0.577719
Dinoflagellates:	Protoperidinium spp. (heterotroph)			0			30	30	2	0.75	1	11390.6	0		0
	Naked dinos	360.457	3.64982	0.970808			10	10	2	0.5	8	1000	3649.82	1000	0.410837
	Prorocentrum spp.			0			20	20	2	0.5	2	2000	0		0
	Ceratium sp.			0			40	40	2	0.5	6	48000	0		0
Ciliates:	Tintinnids (heterotroph)	6.6666	0.067503	0.017955			80	80	2	0.7	1	175616	11854.6	175616	175616
	salp	3.3333	0.0337515	0.00897749			3000
				100			5							596899
			Counts				20
		cells per 1 ml sample	cells per ml seawater	%
Diatoms		25187.8	255.041	97.3168
Chlorophytes		288.365	2.91986	0.0410837							Counts
Cryptophytes		180.228	1.82491	0.00233984						cells per 1 ml sample	cells per ml seawater	%
Globule not det. > 10 um		1946.47	19.7091	0.4792				Small (< 1000 um3)				7.08548
Globule not det. < 10 um		648.822	6.56968	0.739506				Medium (1001 - 5000 um3)				16.8052
Phaeocystis sp.		8470.73	85.7709	0.432529				Large (> 5000 um3)				74.8252
Phaeocystis-like		0	0	0
Prasinophytes		0	0	0				total		0		98.7159
Silicoflagellates		36.6663	0.371267	0.577719
Dinoflagellates		360.457	3.64982	0.410837
Ciliates	Tintinnids (heterotroph)	6.6666	0.067503	175616
Salps	Salp	3.3333	0.0337515	0.00897749

## Sheet: 210
ANT XXIV-3	Transect 19/ T0 Exp 5
Sample	52													4096
Station	210 -1											biovolume/cell	3240.48	17735.1
General remarks	sample in bad condition? Lots of clotting!, 0.3 ml. Counted 30 IF											36373.9
													222069
	Diatomeen:			Counts			Biovolume
		cells per 1 ml sample	per ml seawater	%	measurement	measurement	Average (magnification corrected)	Default dimension	BV formula	BV factor (F1)	BV factor (F2)	Biovolume (um3)	Biovolume*cells per ml		% based on BV
Diatomeen:	Actinocyclus/ Azpeitia			0	diameter	diameter	50	50	1	3.758	1	35306.4	0		0
	Asteromphalus sp.			0	diameter	diameter	37	37	2	0.6	1	10941	0		0
	Chaetoceros sp.(small < 10 um)	144.183	0.965854	1.23733	breedte cel	Width cell	7	7	2	0.7	1	117.649	113.632	117.649	0.0511695
	Chaetoceros sp.(big > 10 um)			0	breedte cel	Width cell	15	15	2	0.7	1	1157.62	0		0
	Chaetoceros atlanticus	72.0913	0.482927	0.618664	breedte cel	Width cell	16.6667	15	2	1	1	4629.63	2235.77	4629.63	1.00679
	Chaetoceros bulbosus			0	breedte cel	Width cell	28	28	2	0.7	1	7529.54	0		0
	Chaetoceros castracanei			0	breedte cel	Width cell	15	15	2	0.7	1	1157.62	0		0
	Chaetoceros convolutus			0	breedte cel	Width cell	20	20	2	1	1	8000	0		0
	Chaetoceros criophilum	6.66667	0.0446588	0.0572111	breedte cel	Width cell	26.6667	20	2	0.7	1	6504.3	290.474	6504.3	0.130803
	Chaetoceros dichaeta			0	breedte cel	Width cell	26	26	2	0.7	1	6028.57	0		0
	Chaetoceros negelectus	720.913	4.82927	6.18664	breedte cel	Width cell	9	21	2	0.7	1	250.047	1207.54	250.047	0.543769
	Centrales not det	144.183	0.965854	1.23733	diameter	diameter	20	20	2	0.9	0.92	5365.44	5182.23	5365.44	2.33361
	Corethron inerme	108.137	0.72439	0.927996	diameter	diameter	16.6667	35	2	1.6	1	18963	13736.6	18963	6.18572
	Corethron pennatum			0	diameter	diameter	12	12	2	1.988	1	13576.7	0		0
	Cylindrotheca closterium/ Nitzschia longissima	937.187	6.27805	8.04263	lengte	Length	93.5	60	2	0.1	1	817.4	5131.68	817.4	2.31085
	Dactyliosolen antarcticus			0	diameter	diameter	50	50	2	1.2	1	216000	0		0
	Dactyliosolen tenuijunctus	2054.6	13.7634	17.6319	diameter	diameter	11.5	9	2	1.465	1	4781.97	65816.2	4781.97	29.6377	29.6377
	Entomoneis sp.			0	lengte	Length	50	50	2	1	2.3	287500	0		0
	Fragilariopsis kerguelensis			0	lengte	Length	35	35	2	0.301	1	1169.24	0		0
	Fragilariopsis rhombica/seperanda			0	lengte	Length	20	20	2	0.301	1	218.167	0		0
	Fragilariopsis curta			0	lengte	Length	25	25	2	0.25	1	244.141	0		0
	Fragilariopsis spp.	1441.83	9.65854	12.3733	lengte	Length	20	15	2	0.25	1	125	1207.32	125	0.543667
	Guinardia sp.			0	breedte cel	Width cell	8	8	2	1.988	1	4022.71	0		0
	Haslea trompii			0	lengte	Length	120	120	2	0.174	1	9103.15	0		0
	Leptocylindrus mediterraneus (with epyphyte)	108.137	0.72439	0.927996	diameter	diameter	20	20	2	1.988	1	62854.9	45531.5	62854.9	20.5033	20.5033
	Leptocylindrus mediterraneus (without)	252.32	1.69024	2.16532	diameter	diameter	10.6667	20	2	1.988	1	9535.32	16117	9535.32	7.25765
	Membraneis imposter			0	lengte	Length	175	175	0	11.8	1	2065	0		0
	Navicula sp.	216.274	1.44878	1.85599	lengte	Length	93.8889	20	2	0.3	0.7	15642.4	22662.5	15642.4	10.2051	10.2051
	Nitzschia sp.			0	lengte	Length	25	25	2	0.2	0.5	62.5	0		0
	Pennates not det	2919.7	19.5585	25.0559	nd	nd	30	30	2	0.263	1	491.169	9606.55	491.169	4.32592
	Plagiotropis gaussii			0	breedte	breedte	50	50	2	0.1	1	125	0		0
	Proboscia alata	36.0457	0.241463	0.309332	breedte	breedte	13.3333	10	2	3.282	1	83797.7	20234.1	83797.7	9.1116
	Proboscia truncata			0	breedte	breedte	45	45	2	1	8	729000	0		0
	Pseudonitzschia sp.	720.913	4.82927	6.18664	nd	nd	100	100	2	0.094	1	830.584	4011.11	830.584	1.80624
	Rhizosolenia sp.			0	breedte	breedte	22	22	2	0.316	1	335.992	0		0
	Thalassiosira spp.	36.0457	0.241463	0.309332	nd	nd	30	30	2	0.7	1	9261	2236.19	9261	1.00698
	Thalassiothrix antarctica			0	lengte	Length	3000	3000	0	9	1	27000	0		0
	Trichotoxon reinboldii			0	lengte	Length	3000	3000	0	9	1	27000	0		0
Naked flagellates	Chlorophyceae			0			10	10	2	0.5	1	125	0		0
	Cryptophyceae	72.0913	0.482927	0.618664			7.5	7.5	2	0.3	1	11.3906	5.50084	11.3906	0.00247708
	Globule not det. (< 10 um)	973.233	6.51951	8.35196			7.5	7.5	2	0.8	1	216	1408.21	216	0.634133
	Globule not det. (> 10 um)	144.183	0.965854	1.23733			12.5	12.5	2	0.8	1	1000	965.854	1000	0.434933
	Phaeocystis sp.			0			5	5	2	0.8	0.7	44.8	0		0
	Phaeocystis-like			0			5	5	2	0.8	0.7	44.8	0		0
	Prasinophyceae			0			5	5	2	0.5	1	15.625	0		0
Silicoflagellates:	Dictyocha speculum	36.0457	0.241463	0.309332	diameter zonder	diameter zonder	26.6667	40	2	0.6	1	4096	989.034	4096	0.445372
Dinoflagellates:	Protoperidinium spp. (heterotroph)			0			30	30	2	0.75	1	11390.6	0		0
	Naked dinos	432.548	2.89756	3.71198			10	10	2	0.5	8	1000	2897.56	1000	1.3048
	Prorocentrum spp.	36.0457	0.241463	0.309332			20	20	2	0.5	2	2000	482.927	2000	0.217467
	Ceratium sp.			0			40	40	2	0.5	6	48000	0		0
Ciliates:	Tintinnids (heterotroph)	36.0457	0.241463	0.309332			80	80	2	0.7	1	175616	42404.8	175616	19.0953	19.0953
	Copepod larvae	3.33333	0.0223294	0.0286055			3000
				100			5								119.095
			Counts				22
		cells per 1 ml sample	cells per ml seawater	%								Counts
Diatoms		9919.22	66.4471	96.9608							cells per 1 ml sample	cells per ml seawater	%
Chlorophytes		0	0	0					Small (< 1000 um3)				11.958
Cryptophytes		72.0913	0.482927	0.00247708					Medium (1001 - 5000 um3)				31.3073
Globule not det. > 10 um		973.233	6.51951	0.634133					Large (> 5000 um3)				56.7348
Globule not det. < 10 um		144.183	0.965854	0.434933
Phaeocystis sp.		0	0	0					total		0		100
Phaeocystis-like		0	0	0
Prasinophytes		0	0	0
Silicoflagellates		36.0457	0.241463	0.445372
Dinoflagellates		468.594	3.13903	1.52227
Ciliates	Tintinnids (heterotroph)	36.0457	0.241463	19.0953
Copepod larvae	Copepod larvae	3.33333	0.0223294	0.0286055

[truncated: 1 more sheets: Sheet1]
