# Supplementary material for: Dissolved Fe across the Weddell Sea and Drake Passage: impact of DFe on nutrient uptake
Source: Copernicus journal article supplement (doi:10.5194/bg-11-651-2014), 2014-02-06
Supplement: Supplementary file 4 [file Electr_Suppl_table_S2_ANT_XXIV-3_Microscopic_counts_Species_Composition.xlsx]

## Sheet: ANNEX II Composition
Based on the available cell countings of the individual stations, it is determined whether there were significant differences in species compostion, between the Western Weddell Sea Region and the Greenwhich Meridian Region. A 2-sided T-test is chosen because there was no proposition regarding the composition in one of the regions. Although the authors propose a T-test with unequal variance for th…
Family	Species	Greenwhich stations (cells/ ml seawater)					Weddell Sea stations (cells/ ml seawater)						2-sided T-test			Statisitical difference
																(FALSE = not significantly from the same population)
	Station number	150	161	167	178		191	193	198	204	210		equal variance	unequal variance		p<0.1	p<0.1
Diatomeen:	Actinocyclus/ Azpeitia	0.690038	0.308356	0	0		0.565327	0	0	0.405018	0		0.7885	0.794746		FALSE	FALSE	0.00427761	0.00395101	0	0		0.00725182	0	0	0.00107628	0
	Asteromphalus sp.	0	0.0616712	0.625	0.269985		0	0.400743	0.533333	0.337515	0		0.933257	0.934883		FALSE	FALSE	0	0.000790202	0.000872768	0.00117135		0	0.00249574	0.00280978	0.000896896	0
	Chaetoceros sp.(small < 10 um)	8.28045	7.09219	37.848	13.9042		6.12437	9.48426	10.3812	6.2047	0.965854		0.16673	0.253789		FALSE	FALSE	0.0513314	0.0908732	0.052852	0.0603246		0.0785614	0.0590658	0.0546914	0.0164881	0.0122586
	Chaetoceros sp.(big > 10 um)	14.7208	0	74.3442	15.6591		0	6.94622	17.4942	9.85453	0		0.236416	0.327231		FALSE	FALSE	0.0912558	0	0.103816	0.0679384		0	0.0432595	0.0921652	0.0261869	0
	Chaetoceros atlanticus	0	2.34351	6.875	0.269985		0.659548	2.00372	1.10222	11.3145	0.482927		0.793922	0.78478		FALSE	FALSE	0	0.0300277	0.00960045	0.00117135		0.00454337	0.0124787	0.00580688	0.0300665	0.00612932
	Chaetoceros bulbosus	0	0	0.25	0.53997		0	0	0	0	0		0.123547	0.221827		FALSE	FALSE	0	0	0.000349107	0.0023427		0	0	0	0	0
	Chaetoceros castracanei	0.460025	0.185014	0	0		0.188442	0	0	0	0		0.276093	0.347458		FALSE	FALSE	0.00285174	0.0023706	0	0		0.00124401	0	0	0	0
	Chaetoceros curvisetus	0	0	0	3.23982		2.54397	0	0	0.729965	0.729965		0.992025	0.992551		FALSE	FALSE	0	0	0	0.0140562		0.0167941	0	0	0.00193977	0.00926473
	Chaetoceros convolutus	0	0	0	0		0	0	0	0.101255	0		0.407084	0.373901		FALSE	FALSE	0	0	0	0		0	0	0	0.000269069	0
	Chaetoceros criophilum	0.411472	1.3876	2	1.34992		0.188206	0.189	0	0	0.0446588		0.00446455	0.0337934		TRUE	TRUE	0.00255076	0.0177795	0.00279286	0.00585676		0.0012409	0.00117705	0	0	0.00056681		0.00255076	0.0177795	0.00279286	0.00585676	0	0.0012409	0.00117705	0	0	0.00056681		0.00255076	0.0177795	0.00279286	0.00585676		0.0012409	0.00117705	0	0	0.00056681
	Chaetoceros dichaeta	10.8106	0.555041	17.5723	18.359		3.20352	5.74399	4.80609	4.01481	0		0.0652643	0.136465		TRUE	FALSE	0.0670159	0.00711181	0.0245384	0.0796519		0.0211218	0.0357722	0.0253201	0.0106688	0		0.0670159	0.00711181	0.0245384	0.0796519	0	0.0211218	0.0357722	0.0253201	0.0106688	0
	Chaetoceros flexuosus	0	0	0.875	0		0	0	0	0	0		0.292352	0.391002		FALSE	FALSE	0	0	0.00122188	0		0	0	0	0	0
	Chaetoceros hendeyi	0	0	0	1.34992		0	0	0	0	0		0.292352	0.391002		FALSE	FALSE	0	0	0	0.00585676		0	0	0	0	0
	Chaetoceros negelectus	0	0	2.25	0		0	0	0.391111	0.391111	4.82927		0.645627	0.624237		FALSE	FALSE	0	0	0.00314196	0		0	0	0.00206051	0.00103932	0.0612932
	Chaetoceros peruvianus	0	0	0.75	0.134992		0	0	0.0355556	0	0		0.216155	0.317806		FALSE	FALSE	0	0	0.00104732	0.000585676		0	0	0.000187319	0	0
	Centrales not det	5.98033	1.97348	4.05514	1.21493		1.03643	4.2746	1.15346	2.91986	0.965854		0.339024	0.370944		FALSE	FALSE	0.0370727	0.0252864	0.00566271	0.00527108		0.0066475	0.0266212	0.00607683	0.00775909	0.0122586
	Corethron inerme	0	0	0	0.134992		0.282663	0	0.0355556	0.135006	0.72439		0.226615	0.203893		FALSE	FALSE	0	0	0	0.000585676		0.00181295	0	0.000187319	0.000358759	0.00919398
	Corethron pennatum	3.22018	0.740055	13.25	5.2647		0.942211	0.133581	0.746667	0.101255	0		0.0644414	0.148418		TRUE	FALSE	0.0199622	0.00948242	0.0185027	0.0228414		0.00604318	0.000831913	0.00393369	0.000269069	0		0.0199622	0.00948242	0.0185027	0.0228414	0	0.00604318	0.000831913	0.00393369	0.000269069	0
	Cylindrotheca closterium/ Nitzschia longissima	6.67036	7.46222	150.04	10.6644		0	12.8238	13.457	18.9791	6.27805		0.322179	0.416333		FALSE	FALSE	0.0413503	0.0956144	0.20952	0.0462684		0	0.0798636	0.0708963	0.0504341	0.0796811
	Dactyliosolen antarcticus	0	0.123342	0	0		0.659548	0	0.515556	0	0		0.262123	0.23681		FALSE	FALSE	0	0.0015804	0	0		0.00423023	0	0.00271612	0	0
	Dactyliosolen tenuijunctus	20.0111	3.6386	202.757	5.80467		3.5804	39.8072	52.6747	70.4416	13.7634		0.637774	0.685992		FALSE	FALSE	0.124051	0.0466219	0.283136	0.0251841		0.0229641	0.24791	0.277508	0.187188	0.174686
	Entomoneis sp.	0	0.0616712	0.375	0.269985		0	0.133581	0	0	0		0.113207	0.186329		FALSE	FALSE	0	0.000790202	0.000523661	0.00117135		0	0.000831913	0	0	0
	Fragilariopsis kerguelensis	7.82043	10.4224	8.375	1.34992		0.942211	3.87385	17.44	15.3569	0		0.910027	0.903232		FALSE	FALSE	0.0484796	0.133544	0.0116951	0.00585676		0.00604318	0.0241255	0.0918798	0.0408088	0
	Fragilariopsis rhombica/seperanda	1.8401	0.49337	4.05514	0.134992		0.0942211	1.06865	1.3457	0	0		0.224154	0.299201		FALSE	FALSE	0.011407	0.00632161	0.00566271	0.000585676		0.000604318	0.0066553	0.00708963	0	0
	Fragilariopsis curta	0	0	0	0		0.753769	0	15.764	32.4834	0		0.220104	0.201519		FALSE	FALSE	0	0	0	0		0.00483455	0	0.08305	0.0863199	0
	Fragilariopsis spp.	22.0812	6.90718	20.2757	18.224		0	14.2932	19.6088	12.4094	9.65854		0.269881	0.268121		FALSE	FALSE	0.136884	0.0885026	0.0283136	0.0790662		0	0.0890147	0.103306	0.0329761	0.122586
	Guinardia sp.	0.230013	0.616712	13.5171	0.53997		0.0942211	0.267162	0	1.45993	0		0.282062	0.379427		FALSE	FALSE	0.00142587	0.00790202	0.0188757	0.0023427		0.000604318	0.00166383	0	0.00387955	0
	Haslea trompii	0.230013	0.678384	1.35171	0.404977		0	0.534324	0.384487	0.729965	0		0.255944	0.292446		FALSE	FALSE	0.00142587	0.00869222	0.00188757	0.00175703		0	0.00332765	0.00202561	0.00193977	0
	Leptocylindrus mediterraneus (with epyphyte)	0	0.123342	0	0		0.659548	0.267162	0.0888889	0.729965	0.72439		0.0190796	0.0232454		TRUE	TRUE	0	0.0015804	0	0		0.00423023	0.00166383	0.000468297	0.00193977	0.00919398		0	0.0015804	0	0	0	0.00423023	0.00166383	0.000468297	0.00193977	0.00919398		0	0.0015804	0	0		0.00423023	0.00166383	0.000468297	0.00193977	0.00919398
	Leptocylindrus mediterraneus (without)	2.76015	2.15849	10.8137	1.48492		3.48618	5.47683	0	7.29965	1.69024		0.776649	0.790156		FALSE	FALSE	0.0171105	0.0276571	0.0151006	0.00644243		0.0223598	0.0341084	0	0.0193977	0.0214526
	Membraneis imposter	0	0.185014	0.25	0.134992		0	0	0.142222	0.0337515	0		0.0971986	0.137654		TRUE	FALSE	0	0.0023706	0.000349107	0.000585676		0	0	0.000749275	8.96896e-05	0		0	0.0023706	0.000349107	0.000585676	0	0	0	0.000749275	8.96896e-05	0
	Navicula sp.	2.76015	2.77521	7	1.88989		3.86307	1.46939	1.3457	4.01481	1.44878		0.369758	0.410797		FALSE	FALSE	0.0171105	0.0355591	0.009775	0.00819946		0.024777	0.00915104	0.00708963	0.0106688	0.018388
	Nitzschia sp.	0.690038	0.308356	1.35171	0.404977		2.44975	0	0.768974	0	0		0.940021	0.935242		FALSE	FALSE	0.00427761	0.00395101	0.00188757	0.00175703		0.0157123	0	0.00405122	0	0
	Pennates not det	12.1907	2.03515	56.7719	9.44947		24.0264	16.206	4.99833	36.1333	19.5585		0.995458	0.995932		FALSE	FALSE	0.0755712	0.0260766	0.079278	0.0409973		0.154101	0.100928	0.0263329	0.0960188	0.248237
	Plagiotropis gaussii	0	0.0616712	0.875	0.404977		0.0942211	0	0.284444	0	0		0.207732	0.290084		FALSE	FALSE	0	0.000790202	0.00122188	0.00175703		0.000604318	0	0.00149855	0	0
	Proboscia alata	0.690038	0.925068	2	0.269985		0.659548	0.267162	0.124444	0.364982	0.241463		0.101683	0.180612		FALSE	FALSE	0.00427761	0.011853	0.00279286	0.00117135		0.00423023	0.00166383	0.000655616	0.000969886	0.00306466
	Proboscia truncata	0	0.431699	0.875	0.404977		0	0.133581	0.0177778	0.202509	0		0.0656802	0.137833		TRUE	FALSE	0	0.00553141	0.00122188	0.00175703		0	0.000831913	9.36594e-05	0.000538138	0		0	0.00553141	0.00122188	0.00175703	0	0	0.000831913	9.36594e-05	0.000538138	0
	Pseudonitzschia sp.	3.91021	3.88529	14.8688	8.77451		5.74749	6.01115	2.69141	14.5993	4.82927		0.748773	0.754148		FALSE	FALSE	0.0242398	0.0497827	0.0207633	0.0380689		0.0368634	0.0374361	0.0141793	0.0387955	0.0612932
	Rhizosolenia sp.	0	0.123342	0	0		0	0.267162	0	0	0		0.743473	0.726342		FALSE	FALSE	0	0.0015804	0	0		0	0.00166383	0	0	0
	Thalassiosira spp.	4.37024	0.740055	2.70343	3.10483		4.23995	1.33581	5.38282	3.64982	0.241463		0.854452	0.848367		FALSE	FALSE	0.0270916	0.00948242	0.00377514	0.0134705		0.0271943	0.00831913	0.0283585	0.00969886	0.00306466
	Thalassiothrix antarctica	0.0822944	0	0.125	0		0.0125471	0	0	0	0		0.116242	0.21168		FALSE	FALSE	0.000510151	0	0.000174554	0		8.04746e-05	0	0	0	0
	Trichotoxon reinboldii	0.0411472	0.185014	1.125	0.202489		0.112923	0.042	0.0177778	0.0337515	0		0.157093	0.256475		FALSE	FALSE	0.000255076	0.0023706	0.00157098	0.000878514		0.000724272	0.000261566	9.36594e-05	8.96896e-05	0
	Trachyneis aspera	0	0.0616712	0	0		0	0	0	0	0		0.292352	0.391002		FALSE	FALSE	0	0.000790202	0	0		0	0	0	0	0
Naked flagellates	Chlorophyceae	2.53014	0.308356	6.75856	0		0	0	0.576731	2.91986	0		0.297954	0.366137		FALSE	FALSE	0.0156846	0.00395101	0.00943785	0		0	0	0.00303841	0.00775909	0
	Cryptophyceae	2.07011	0.431699	2.70343	3.64479		0.282663	0.534324	2.11468	1.82491	0.482927		0.156903	0.195627		FALSE	FALSE	0.0128328	0.00553141	0.00377514	0.0158132		0.00181295	0.00332765	0.0111408	0.00484943	0.00612932
	Globule not det. (< 10 um)	13.5707	7.64723	8.11028	16.6041		6.03015	17.3655	4.03711	19.7091	6.51951		0.861055	0.852992		FALSE	FALSE	0.0841264	0.097985	0.0113254	0.0720381		0.0386764	0.108149	0.0212689	0.0523739	0.0827458
	Globule not det. (> 10 um)	3.22018	2.34351	9.46199	3.37481		0	1.87014	4.4216	6.56968	0.965854		0.38517	0.401993		FALSE	FALSE	0.0199622	0.0300277	0.013213	0.0146419		0	0.0116468	0.0232945	0.017458	0.0122586
	Phaeocystis sp.	0	0	14.8688	0.67		0.188442	0	0.192244	85.7709	0		0.519763	0.485395		FALSE	FALSE	0	0	0.0207633	0.00290685		0.00120864	0	0.0010128	0.227923	0
	Phaeocystis-like	1.61009	0	0	3.91478		0	2.53804	1.15346	0	0		0.537923	0.569819		FALSE	FALSE	0.0099811	0	0	0.0169846		0	0.0158063	0.00607683	0	0
	Prasinophyceae	0	0.49337	0	0		0	0	0	0	0		0.292352	0.391002		FALSE	FALSE	0	0.00632161	0	0		0	0	0	0	0
	Choanoflagellate	0.460025	3.94696	0	67.4962		0	0	0	0	0.241463		0.256751	0.357508		FALSE	FALSE	0.00285174	0.0505729	0	0.292838		0	0	0	0	0.00306466
Silicoflagellates:	Dictyocha speculum	2.76015	0.98674	7.25	1.48492		2.07287	2.27088	0.106667	0.371267	0		0.160566	0.231489		FALSE	FALSE	0.0171105	0.0126432	0.0101241	0.00644243		0.013295	0.0141425	0.000561956	0.000986586	0
Dinoflagellates:	Protoperidinium spp. (heterotroph)	0	0	0	0		0.188442	0	0.0177778	0	2.89756		0.369065	0.337581		FALSE	FALSE	0	0	0	0		0.00120864	0	9.36594e-05	0	0.0367759
	Naked dinos	3.91021	1.97348	5.40685	6.88		0.471106	2.00372	2.88365	3.64982	0.241463		0.058106	0.0796717		TRUE	TRUE	0.0242398	0.0252864	0.00755028	0.0298495		0.00302159	0.0124787	0.0151921	0.00969886	0.00306466		0.0242398	0.0252864	0.00755028	0.0298495		0.00302159	0.0124787	0.0151921	0.00969886	0.00306466		0.0242398	0.0252864	0.00755028	0.0298495		0.00302159	0.0124787	0.0151921	0.00969886	0.00306466
	Prorocentrum spp.	0	0.555041	0	0.269985		0.753769	0.133581	0	0	0		0.891086	0.888213		FALSE	FALSE	0	0.00711181	0	0.00117135		0.00483455	0.000831913	0	0	0
	Ceratium sp.	0.230013	0	0	0		0.188442	0	0	0	0.241463		0.728384	0.72771		FALSE	FALSE	0.00142587	0	0	0		0.00120864	0	0	0	0.00306466
Ciliates:	Ciliates	0	0.246685	0	0.134992		0	0	0	0	0		0.111218	0.207817		FALSE	FALSE	0	0.00316081	0	0.000585676		0	0	0	0	0
Ciliates:	Tintinnids (heterotroph)	0	0.0616712	1.35171	0.404977		0.57	0.400743	0.576731	0.067503	0.0223294		0.690127	0.72355		FALSE	FALSE	0	0.000790202	0.00188757	0.00175703		0.00365588	0.00249574	0.00303841	0.000179379	0.000283405
																													0.113769	0.0691426	0.0549552	0.140542		0.0356577	0.0527556	0.0457571	0.0232043	0.0128254	0.0609566	0.0267906	0.0446464	0.0103431	0.0357062		0.00849272	0.0153196	0.0156604	0.0116386	0.0128254
Diatoms		130.952	59.0502	660.201	125.61		67.2107	133.454	173.732	255.041	66.4471		0.443814	0.514278		FALSE	FALSE	0.814107	0.796903	0.921923	0.545388		0.862156	0.831122	0.915367	0.678437	0.851478
Chlorophytes		2.53014	0.308356	6.75856	0		0	0	0.576731	2.91986	0		0.297954	0.366137		FALSE	FALSE	0.0157294	0.00416137	0.00943785	0		0	0	0.0030387	0.00776716	0
Cryptophytes		2.07011	0.431699	2.70343	3.64479		0.282663	0.534324	2.11468	1.82491	0.482927		0.156903	0.195627		FALSE	FALSE	0.0128695	0.00582592	0.00377514	0.0158253		0.00362591	0.00332765	0.0111419	0.00485448	0.00618841
Globule not det. > 10 um		13.5707	7.64723	8.11028	16.6041		6.03015	17.3655	4.03711	19.7091	6.51951		0.861055	0.852992		FALSE	FALSE	0.084367	0.103202	0.0113254	0.0720932		0.0773527	0.108149	0.0212709	0.0524284	0.0835435
Globule not det. < 10 um		3.22018	2.34351	9.46199	3.37481		0	1.87014	4.4216	6.56968	0.965854		0.38517	0.401993		FALSE	FALSE	0.0200193	0.0316264	0.013213	0.0146531		0	0.0116468	0.0232967	0.0174761	0.0123768
Phaeocystis sp.		0	0	14.8688	68		0.188442	0	0.192244	85.7709	0		0.888828	0.886466		FALSE	FALSE	0	0	0.0207633	0.295249		0.00241727	0	0.0010129	0.22816	0
Phaeocystis-like		1.61009	0	0	3.91478		0	2.53804	1.15346	0	0		0.537923	0.569819		FALSE	FALSE	0.0100096	0	0	0.0169976		0	0.0158063	0.0060774	0	0
Prasinophytes		0	0.49337	0	0		0	0	0	0	0		0.292352	0.391002		FALSE	FALSE	0	0.0066582	0	0		0	0	0	0	0
Silicoflagellates		2.76015	0.98674	7.25	1.48492		2.07287	2.27088	0.106667	0.371267	0.241463		0.166208	0.239591		FALSE	FALSE	0.0171594	0.0133164	0.0101241	0.00644736		0.02659	0.0141425	0.000562009	0.000987612	0.0030942
Dinoflagellates		4.14023	2.52852	5.40685	7.14998		1.60176	2.1373	2.88365	3.64982	3.13903		0.0611295	0.114646		TRUE	FALSE	0.0257391	0.0341233	0.00755028	0.0310445		0.0205468	0.0133106	0.0151935	0.00970895	0.0402246		0.0257391	0.0341233	0.00755028	0.0310445		0.0205468	0.0133106	0.0151935	0.00970895	0.0402246
Ciliates		0	0.31	1.35171	0.53		0.57	0.400743	0.576731	0.067503	0.241463		0.544186	0.596289		FALSE	FALSE	0	0.00418356	0.00188757	0.00230121		0.00731176	0.00249574	0.0030387	0.000179566	0.0030942
																													0.0257391	0.0341233	0.00755028	0.0310445		0.0205468	0.0133106	0.0151935	0.00970895	0.0402246	0.021938
[truncated: 1 more columns]
